# Supplementary material for: Utilization of Biochar for Eliminating Residual Pharmaceuticals from Wastewater Used in Agricultural Irrigation: Application to Ryegrass
Source: MDPI journal article supplement (doi:10.3390/agronomy12122987), 2022-11-28
Supplement: s1 [file s1]

## Supplementary Material

# Utilization of Biochar for Eliminating Residual Pharmaceuticals from Wastewater Used in Agricultural Irrigation: Application to Ryegrass

Mayowa Akintoroye <sup>1,2</sup>, Robert Ato Newton <sup>2</sup>, Sylvie Kříženecká <sup>2</sup>, Stanislav Hejda <sup>2</sup>, Pavel Krystyník<sup>2</sup>, Markus Ahnert <sup>1</sup>, Josef Trögl <sup>2</sup>, Peter Krebs <sup>1</sup> and Karim Suhail Al Souki <sup>2,\*</sup>

This supplementary material was prepared to add the readers more details, for which there was not enough space in the main manuscript, about:

Part A. Characterization of Biochar 4073

Part B. Justification of the biochar choice and concentrations

Part C. Parameters of the soil used in the experiment

## **Part A: Characterization of Biochar 4073**

### **Biochar 4073**

V našich experimentech byl používán biochar typu 4073 a jeho různé modifikace. Biochar 4073 byl připraven pyrolýzou při 470 °C po dobu 25 minut z digestátu o složení z dřevní hmoty a údržby zeleně (60 %) a ze separátu z kukuřice (40 %), rovněž jako biochar 0000, 4073 se následně mlel opakovaně 2,5 hodiny a na kolívkovém mlýnu přes několik průchodů (5xVR po dobu 30 min), pyrolýza byla realizována společností Bioúhel s.r.o. Zlín, o sumárním složení C<sub>14</sub>O, 2% znečištění solemi Si, Al, K, Ca, Mg, z důvodu ochrany patentu nejsou uvedeny veškeré detaily přípravy biocharu typu 4073.

Další typy biocharů (4075, 4076, 1007, S01-19, S02-19) použitých okrajově pro porovnání účinnosti sorpce vůči biocharu 4073. V některých případech bylo srovnání účinnosti prováděno vůči aktivímu uhlí.

- **Aktivní uhlí**

Velikost částic (0,3-0,5mm). Art. 9631. Výrobce Merck (pro plynovou chromatografii).

# 1 Charakteristika

## 1.1 BET Specifikace aktivního povrchu biocharu výrobní šarže 4073

Zjištění celkové aktivní plochy, počet, velikost, povrch a objem pórů testovaného materiálu může být dalším významným ukazatelem využití biocharu k následné sorpci a aplikaci v katalýze, či elektrodách. V našem případě se jedná o testovaný materiál biochar 4073. Testovaný produkt obsahuje ve své struktuře převážně mikropóry, mezopóry, rovněž makropóry, které v rámci testování nebyly blíže identifikovány. Rádus mikropórů se rovná 0 až 2 nm a mezopórů 2 až 50 nm.

Izotermní křivka u prováděné analýzy má tvar hystereze, která je typická pro mezoporézní charakter struktury materiálu. Měrný specifický povrch biocharu je pomocí BET analýzy stanoven na  $571,6 \pm 9,2 \text{ m}^2/\text{g}$ . Objem monomolekulární vrstvy byl zjištěn, a to  $131,3 \text{ cm}^3/\text{g}$ , což charakterizuje poróznost testovaného materiálu.

Plocha mikropórů je rovna  $325,7 \text{ m}^2/\text{g}$ , kdežto mezopóry a makropóry společně tvoří povrch o hodnotě  $245,9 \text{ m}^2/\text{g}$ . Největší distribuce mezopór byla 2 a 7 nm, což je patrné na Obrázku 12, u mikropór 1,05 nm. Celkový objem mezopórů byl zjištěn  $0,189 \text{ cm}^3/\text{g}$  (viz Obrázek 11), u mikropórů  $0,247 \text{ cm}^3/\text{g}$ . Z částečných zjištěných měrných specifických povrchů můžeme vyvodit závěr, že převažující charakter biocharu 4073 je mikroporézní, obsahuje cca o 30 % více mikropórů než mezopórů.

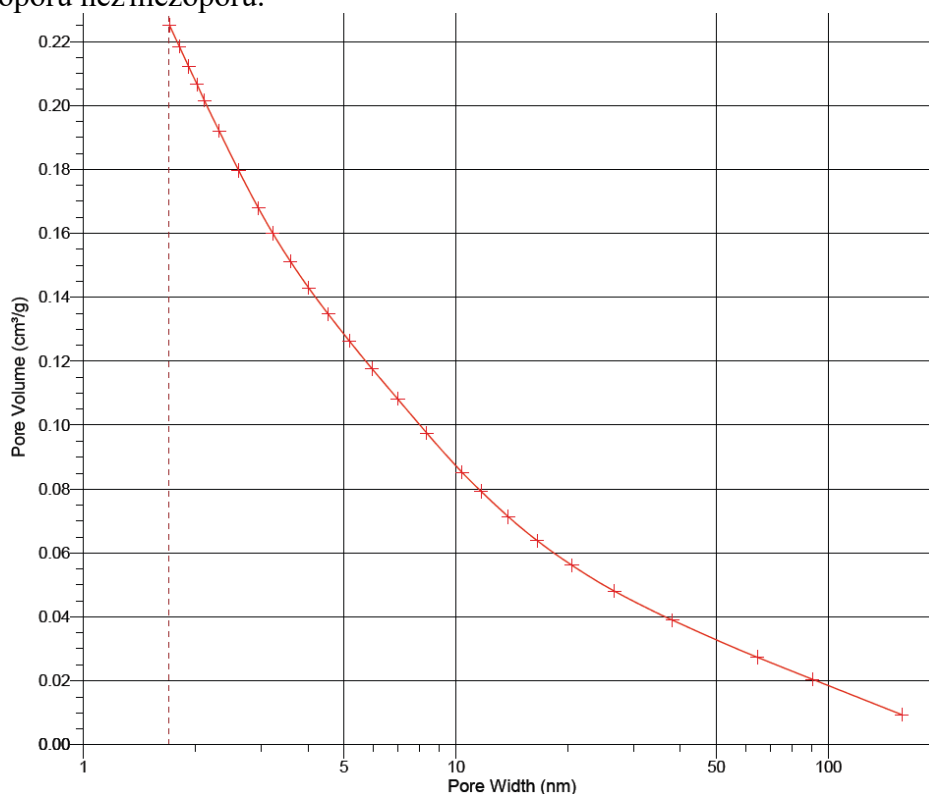

Obr. S1: Celkový objem mezopórů biocharu 4073

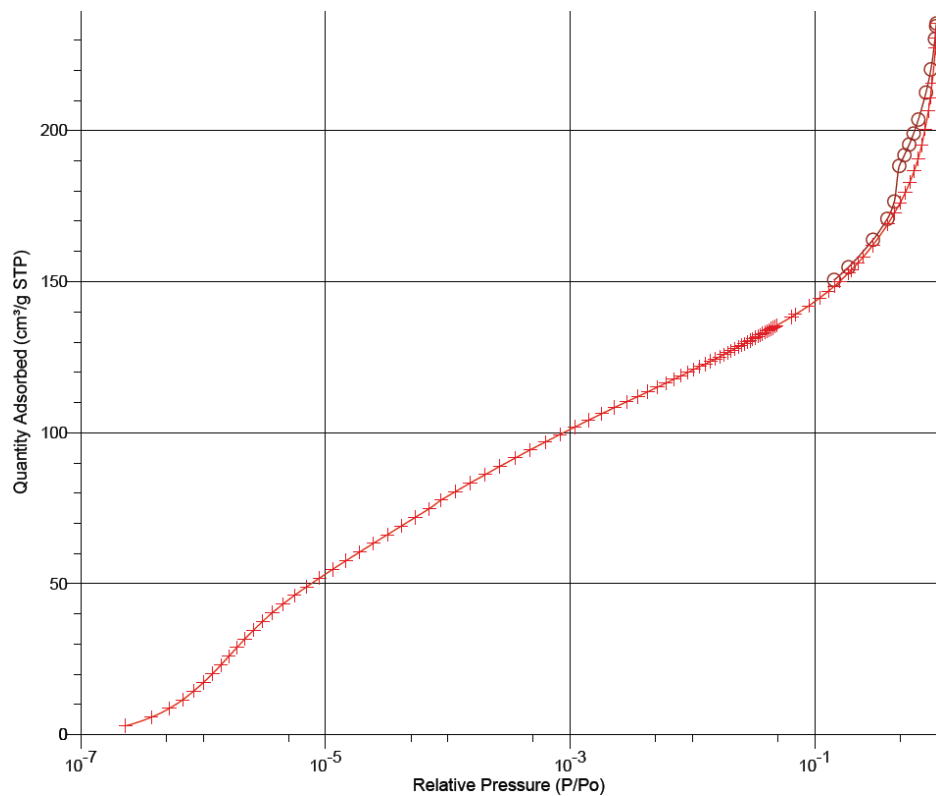

Obr. S2: Největší distribuce mezopórů biocharu 4073

## 1.2 Distribuce velikosti částic šarže biocharu 4073

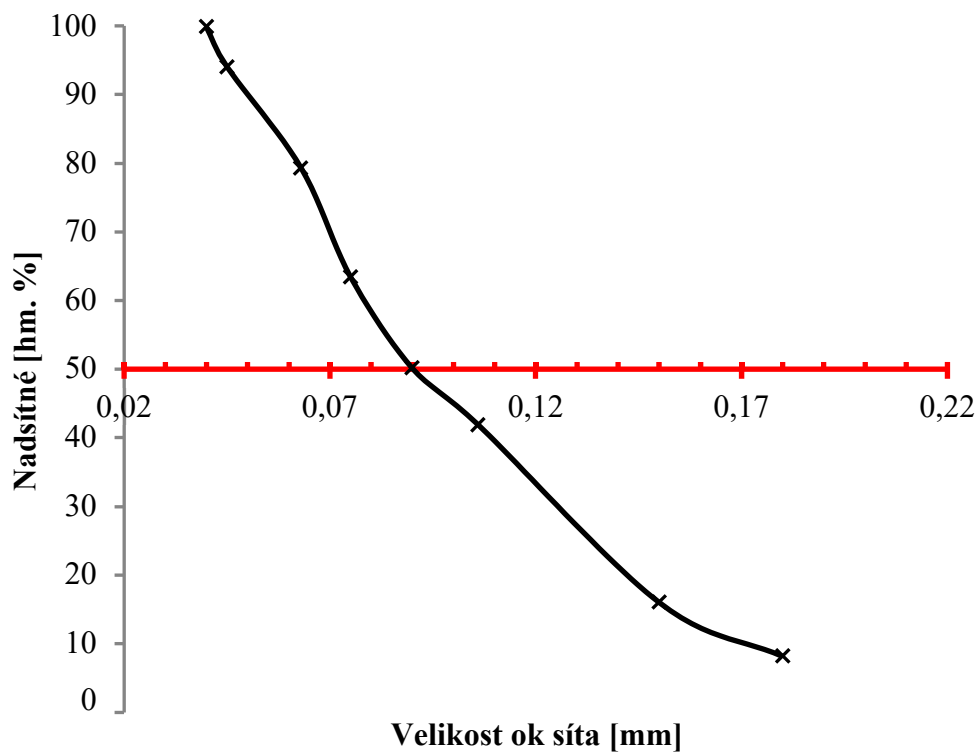

Střední velikost zrna byla stanovena 0,09 mm.

### 1.3 FT-IR

Pro lepší identifikaci píků byla provedena úprava záznamu - druhá derivace byla vytvořena pomocí software v programu Omnic. Byl použit Savitzky-Golay 13 bodový postup. Píky byly vyhledávány v oblastech předpokládaného výskytu hledaných funkčních skupin – viz obrázek 4, kde spodní spektrum je druhá derivace.

Valenční vibrace pravděpodobně skupiny –OH byla nalezena v oblasti kolem  $3400\text{ cm}^{-1}$  ( $3450\text{--}3200\text{ cm}^{-1}$ ), deformační vibrace této funkční skupiny by se mohly nacházet mezi  $1300$  až  $1200\text{ cm}^{-1}$ , kde byl nalezen silnější pík u hodnoty  $1250\text{ cm}^{-1}$ .

Přítomnost aromatických sloučenin podporuje pík na pozici  $3015,43\text{ cm}^{-1}$ . Mezi  $2000\text{--}1650\text{ cm}^{-1}$  se nachází další pás, který je spojován s deformačními vibracemi vazeb v aromátech. (Tabulky k interpretaci RK). Další charakteristický absorpční pás by se měl nacházet v oblasti  $1625\text{--}1590\text{ cm}^{-1}$ . V této oblasti je umístěn silně narůstající pás. Pomocí druhé derivace byl v této oblasti nalezen pík na hodnotě  $1604,89$  pík, který je spojován s přítomností dvojné vazby  $\text{C}=\text{C}$ .

V oblasti pod  $3000\text{ cm}^{-1}$  se nacházejí píky valenčních vibrací vazby  $\text{C-H}$  ve funkčních skupinách  $\text{CH}_3$  a  $\text{CH}_2$ . Na průměrném spektru byly v dané oblasti nalezeny píky na hodnotě  $2945,54\text{ cm}^{-1}$ , který může být přiřazen asymetrickým vibracím vazby v metylové skupině, a pík na pozici  $2872,74\text{ cm}^{-1}$ , který může být přiřazen symetrické vibraci  $\text{C-H}$  vazby v této skupině. Při použití druhé derivace byly nalezeny vibrace methylové skupiny asymetrické i symetrické ( $2963,91\text{ cm}^{-1}$  a  $2877,86\text{ cm}^{-1}$ ) a také vibrace methylenové skupiny, asymetrické i symetrické ( $2925,86\text{ cm}^{-1}$  a  $2854,95\text{ cm}^{-1}$ ). (Infrared Spectral Interpretation, Thermo Scientific) Deformační vibrace metylové a methylenové skupiny v oblasti kolem  $1490\text{--}1380\text{ cm}^{-1}$  nejsou patrné, protože v této oblasti se nachází široký pás.

Uskupení dvou píků u  $1385,01\text{ cm}^{-1}$  (menší) a  $1363,55\text{ cm}^{-1}$  (větší) a třetí pík na pozici  $1262,93\text{ cm}^{-1}$  by mohly znamenat přítomnost t-butylové skupiny. Pravděpodobnost je velmi malá, nicméně píky v této oblasti jsou přiřazovány přítomnosti  $-\text{CH}_3$  skupiny. (Infrared Spectral Interpretation, Thermo Scientific)

Široká pás s maximem kolem  $1716,01\text{ cm}^{-1}$  lze přiřadit vibracím  $\text{C}=\text{O}$  funkční skupiny. Tento pás může znamenat přítomnost různých kyslíkatých skupin (ketony, estery...). Široký pás kolem  $1540\text{ cm}^{-1}$  může být přiřazen vibracím skupiny  $\text{C}=\text{C}$  v aromatických sloučeninách. Oba tyto pásy mají přibližně stejnou intenzitu.

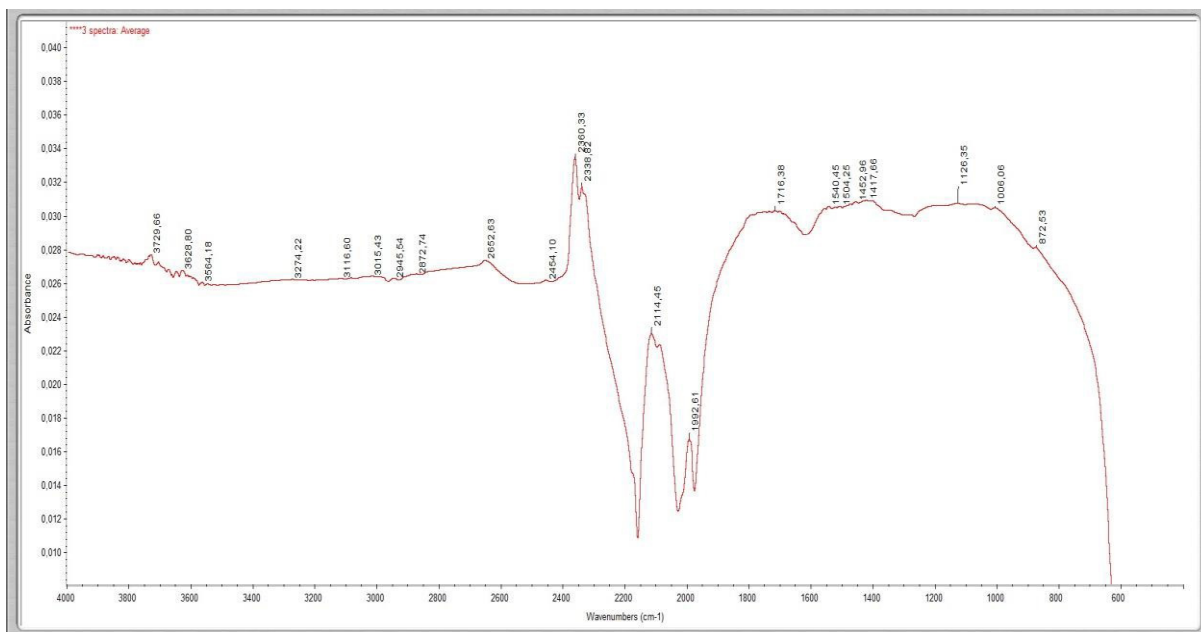

Obr. S3: Spektrum vzorku 1 Biochar 4073

V oblastech  $3900\text{--}3400\text{ cm}^{-1}$  a  $1900\text{--}1300\text{ cm}^{-1}$  se projevují hlavně vibrace vlhkosti, která může pocházet i ze vzduchu. Vibrace oxidu uhličitého kolem  $3700\text{ cm}^{-1}$  a  $2300\text{ cm}^{-1}$  jsou určitě spojeny se vzduchem mezi částicemi hodnocené látky. Tyto oblasti proto byly vyloučeny z hodnocení. **FT-IR analýzy budou jako samostatná zpráva.**

## 1.4 TGA a DSC

U biocharu byl do teploty  $550\text{ °C}$  zaznamenán minimální exotermní rozklad s váhovým úbytkem 13 %. Od této teploty do  $700\text{ °C}$  byl hmotnostní pokles 77 % s exotermním maximem při  $673\text{ °C}$ , viz obr. 3, před dosažením maxima měla křivka DSC vlnovitý průběh, s celkovým teplotním zabarvením  $32,4\text{ kJ/g}$ .

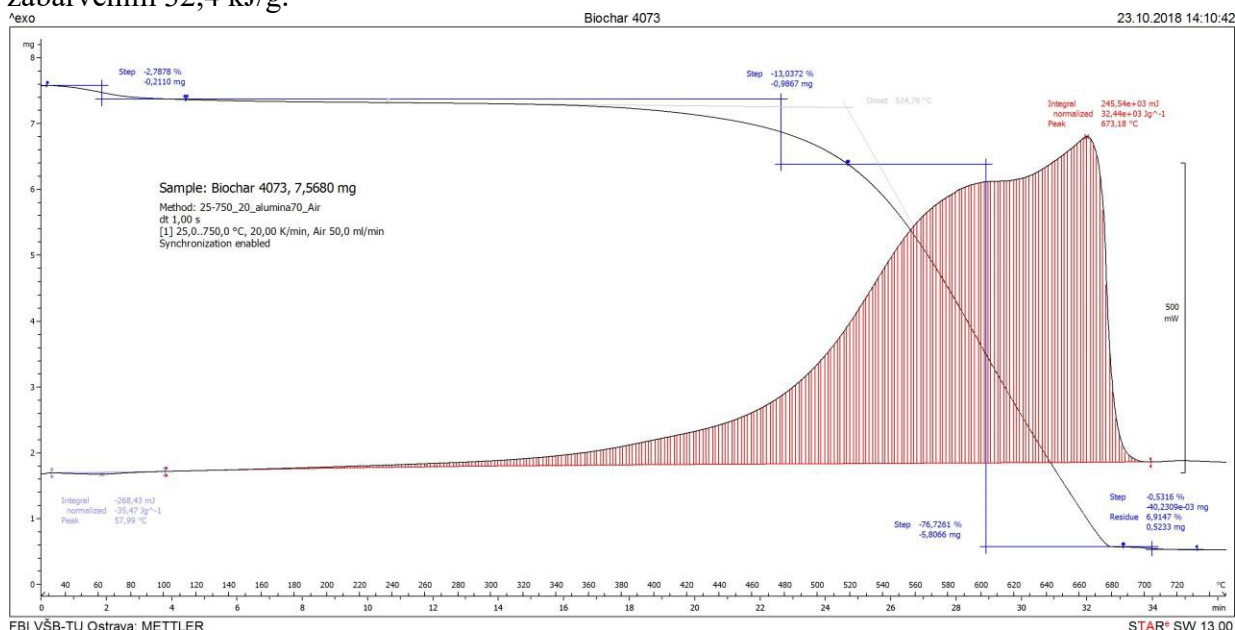

### 1.5 Spalné teplo

Čistý biochar 4073 má spalné teplo 31,635 MJ/kg (za dvou měření 31,63 a 31,64 MJ/kg).

Všechna měření, i kalibrace probíhala v manuálním režimu s výpočtem spalného tepla podle ČSN 44 1352 (bez výplachu kalorimetrické tlakové nádoby), při tlaku kyslíku v kalorimetrické tlakové nádobě 3 MPa (kyslík čistoty 99,99 %).

### 1.6 SEM

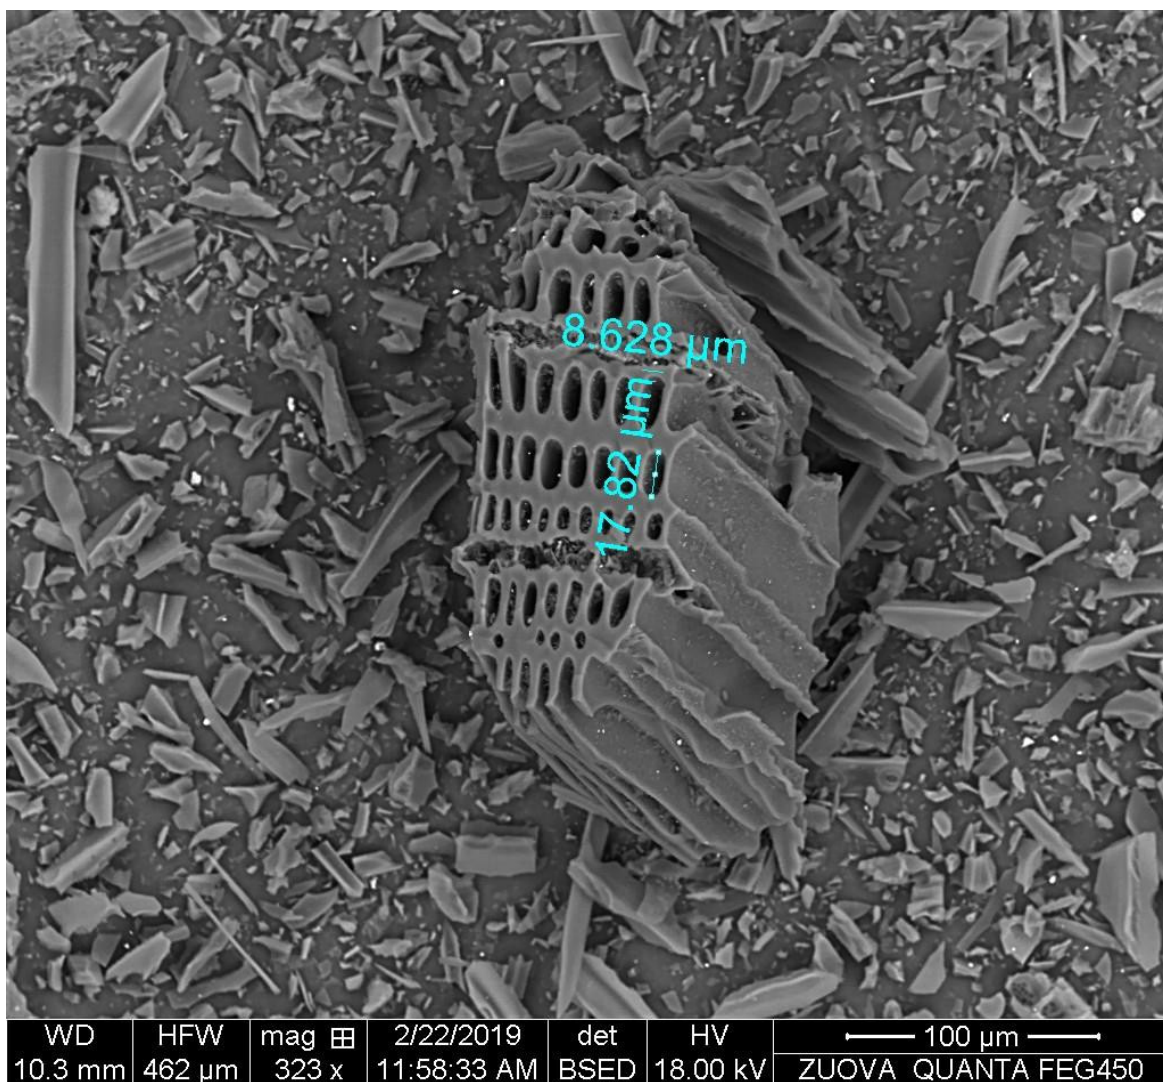

Obr. S5: SEM biocharu 4073

## 2 Reakce (modifikace)

### 2.1 Oxidace- Biochar-OXO

Navážka biocharu (3,48 g) byla v Erlenmeyerově baňce převrstvena 40 ml  $\text{H}_2\text{SO}_4$  + 20 ml  $\text{HNO}_3$ . Tato suspenze byla 1 hod míchána magnetickým míchadlem, poté byla ochlazená vodní lázní s ledem (5 - 10 °C) a po malých dávkách (20 min) přidán  $\text{KClO}_3$  (18 g). Pozvolna po přidání chlorečnanu se zvyšovala teplota na 35 - 55 °C. Při této teplotě byla reakční směs míchána 10 hodin, dále ponechána 4 dny odstát v klidovém stavu. Směs byla rozložena 120 ml destilovanou vodou a následoval 10x opakovaný proces odstředování s následnou dekantací (nad usazeninou se dekantoval koloidní roztok). Po zdekantování byla usazenina promívaná destilovanou vodou a proces se opakoval. Zahuštěná vodní suspenze byla sušena 2 dny při 60 - 70 °C. Ve spektru, které charakterizuje průběh teplotního rozkladu lze identifikovat 3 teplotní rozpětí s výraznějšími váhovými úbytky vzorku, a to 50 -130 °C (úbytek 17,4 %) 130-300 (18,7 %), 300-400 °C (20,8 %). Tento kaskádový pozvolný rozklad vyústí v prudký exoeffekt s maximem při 425 °C (úbytek 44 %) s tepelným zabarvením 13,0 kJ/g.

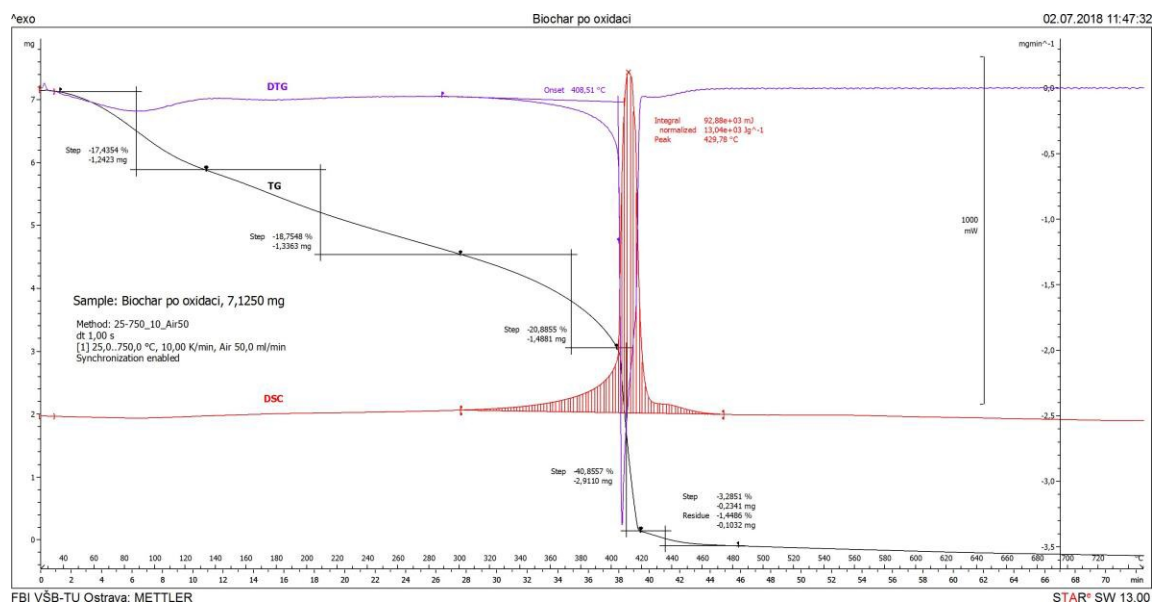

Obr. S6: TGA a DSC Biochar-OXO



## **2.2 Dlouhodobá společná oxidace grafitu a biocharu při laboratorní teplotě**

4 gramy grafitu a 2 gramy biocharu byly v Erlenmeyerově baňce převrstveny 50 ml  $\text{H}_2\text{SO}_4$  a 30 ml  $\text{HNO}_3$ . Tato suspenze byla 1 hod míchána magnetickým míchadlem, poté byla ochlazená ve vodní lázni na 5-10 °C. A po malých dávkách (30 min) bylo přidáno 30 g  $\text{KClO}_3$ . Reakční směs byla míchána během dvou dnů 10 hod. Po té byla ponechána v klidu dalších 10 dní. Směs bez rozkladu byla odstředěna, zdekantována a usazenina byla promíchána s destilovanou vodou a opět následovalo odstředování, dekantace (15x). Poté byl product rozdělen na dvě části (vodní suspenze) a suspenze, která byla vysušena na prášek (50-40 °C) a dána na analýzu FT-IR a Raman (kap. ).

## **2.3 Krátkodobá společná oxidace grafitu a biocharu při zvýšené teplotě**

4 gramy grafitu a 2 gramy biocharu byly v Erlenmeyerově baňce převrstveny 50 ml  $\text{H}_2\text{SO}_4$  a 30 ml  $\text{HNO}_3$ . Tato suspenze byla 1 hod míchána magnetickým míchadlem, poté byla ochlazená ve vodní lázni na 5-10 °C. A po malých dávkách (30 min) bylo přidáno 30 g  $\text{KClO}_3$ . Reakční směs byla opatrně na vodní lázni ohřátá na 45-55 °C po dobu 1 hod. Poté byla ponechána v klidu přes noc při laboratorní teplotě. Druhý den byla směs bez rozkladu přefiltrována, filtrát byl ponechán mimo a filtrační koláč byl opakovaně promíván destilovanou vodou. Analýza FT-IR a raman (viz kap.)

## **2.4 Reakce grafitu společně s biocharem s 30 % $\text{H}_2\text{O}_2$**

4 g grafitu a 2 gramy biocharu 4073 byly v Erlenmeyerově baňce převrstveny 50 ml 30 %  $\text{H}_2\text{O}_2$ . Reakce byla míchána 4-5 hodin při laboratorní teplotě a z toho 2 hodiny sonifikována při 50 °C. Zaznamenali jsme exotermní průběh reakce (reakční směs se vzdouvala). Po skončení byla směs přefiltrována přes filtrační papír a sušena při 45-50°C po dobu 12 hodin.

## **2.5 Reakce grafitu společně s biocharem s acetanhydridem**

4 gramy grafitu a 2 g biocharu 4073 byly v Erlenmeyerově baňce převrstveny 50 ml  $(\text{CH}_3\text{CO})_2\text{O}$  a míchání při laboratorní teplotě 2 hod z toho 1 hod sonikováno při 50 °C. Druhý den bylo do reakční směsi přidán 30%  $\text{H}_2\text{O}_2$  40 ml a opět mícháno 2 hod z toho 1 hod sonikace. Reakční průběh byl bez tepelného zabarvení. Poté byla reakční směs přefiltrována přes filtrační papír a filtrát byl promyt destilovanou vodou a ethanolem a byl sušen při 40-50 °C po dobu 12 hodin.

## **2.6 Reakce grafitu společně s biocharu s manganistanem draselným v prostředí pouze kyseliny sírové**

4 g grafitu a 2 g biocharu biocharu 4073 byly v Erlenmeyerově baňce převrstveny 100 ml 90%  $\text{H}_2\text{SO}_4$  a toto bylo mícháno po dobu 30 min při laboratorní teplotě. Následovalo pomalé přidání  $\text{KMnO}_4$  (18g), reakční teplota samovolně vystoupala po 50 % přidavku na teplotu 50-60 °C, směs byla poté mírně chlazená pomocí vodní lázně s ledem na teplotu 45 °C, a dosypal se zbytek manganistanu. Následovalo vyhřátí vodní lázně na 60 °C po dobu 3,5 hod. Po ochlazení bylo přidáno 100 ml destilované vody, ponecháno v klidu a zředěná  $\text{H}_2\text{SO}_4$  byla dekantována. K pevné části reakční směsi bylo přidáno 30 ml 10%  $\text{HCl}$  a 30 ml  $\text{H}_2\text{O}_2$  (30 %). Reakční směs se zahřívala s vývinem plynů. Během 4 dnů byla provedena dekantace, a následovalo odstřeďování reakční směsi, dekantace kapalně faze, promíchání s novou destilovanou vodou a znova dekantace (min. 20-krát, vše až do neutrálního pH dekantované faze).

## **2.7 Infračervená spektra a Ramanova spektra u výchozího biocharu a produktu z reakcí (2.1, 2.2, 2.3)**

Pořídili jsme FT-IR a Ramanova spektra výchozího biocharu, biocharu oxi připraveného podle metody Hummerse, společná oxidace grafitu a biocharu (2.1, chlorečnanem, 2.2 a to jak dlouhodobým stykem tak krátkodobým (2.3). Principálně mají spektra stejné vazebné vibrace funkčních skupin, lišící se intenzitou absorbance  $-\text{OH}$  ( $3400\text{ cm}^{-1}$ ),  $\text{CH}$  ( $2900\text{ cm}^{-1}$ ),  $\text{C-O}$ ,  $\text{C-O-C}$  ( $1050\text{ cm}^{-1}$ ) v intervalech  $1300\text{-}1900\text{ cm}^{-1}$  ( $\text{C=O}$ ,  $\text{C=C}$ ,  $-\text{COO}-$ ). Dá se konstatovat porovnáním IR specter oxidace chlorečnanem, že se neprojevil vliv reakcí doby a teploty. Určité rozdíly v uspořádání produktů byl zaznamenán v Ramanových spektrech. Pořízená Ramanová spektra (laser  $532\text{ nm}$ ) jsou charakterizována dvěma výraznými pásy  $1596\text{ cm}^{-1}$ -tzv. G Peak.,  $1338\text{ cm}^{-1}$ - čistý biochar  $1360$  oxidované produkty, tzv. D Peak. Píky G a D charakterizují  $\text{sp}^2$  hybridizaci vazeb C-C, nižší poměry  $I_D/I_G$  intenzit peaků značí defekt nebo neuspořádanost v grafitické struktuře (X,Y,Z), např. Biochar  $I_D/I_G = 0,904$  oproti oxidovanému  $I_D/I_G 0,854$ . Při dlouhodobé oxidaci  $I_D/I_G = 0,827$ , krátkodobá oxidace  $I_D/I_G = 0,068$ . Na spektru se objevil pík G-D, při  $2970\text{ cm}^{-1}$  a u dlouhodobé oxidace i pík 2D  $2700\text{ cm}^{-1}$ . Charakterizuje vícevrstevnatou strukturu.

FT-IR

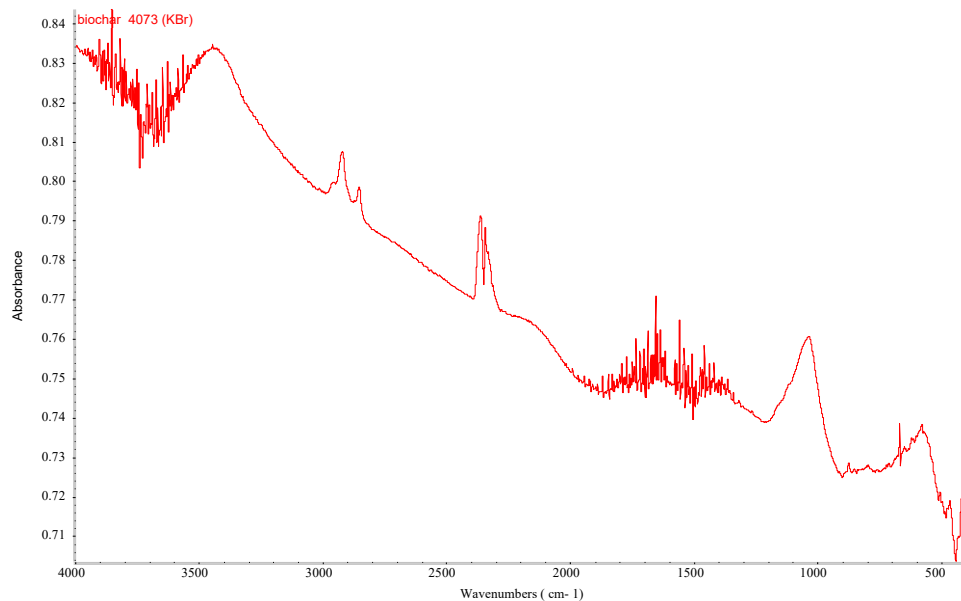

*Obr. S7: IR- spectrum Biochar 4073 (kap. 1.1)*

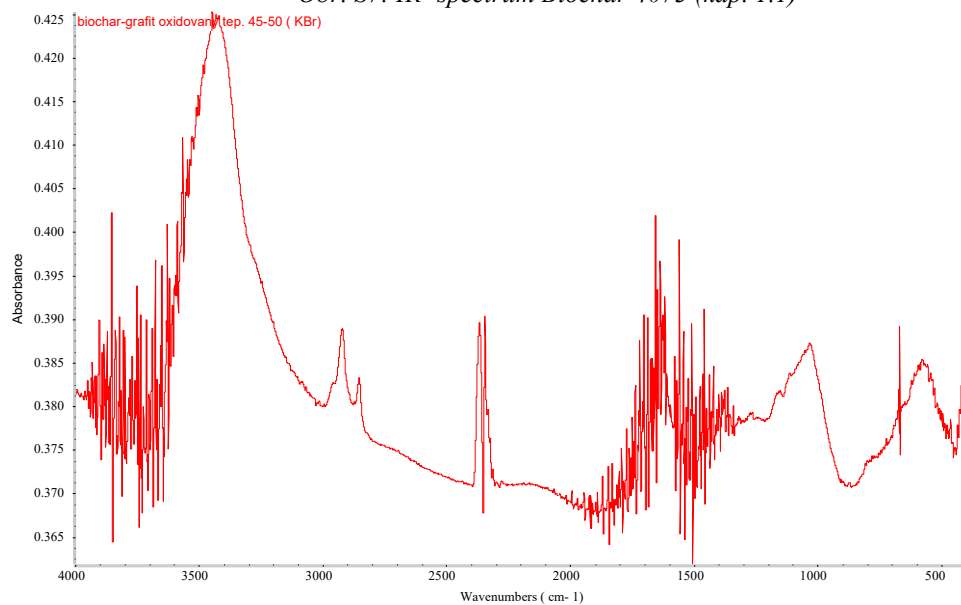

*Obr. S8: IR-spektrum Biochar-grafit oxidovaný tepl. 45-50 °C (kap. 2.3)*

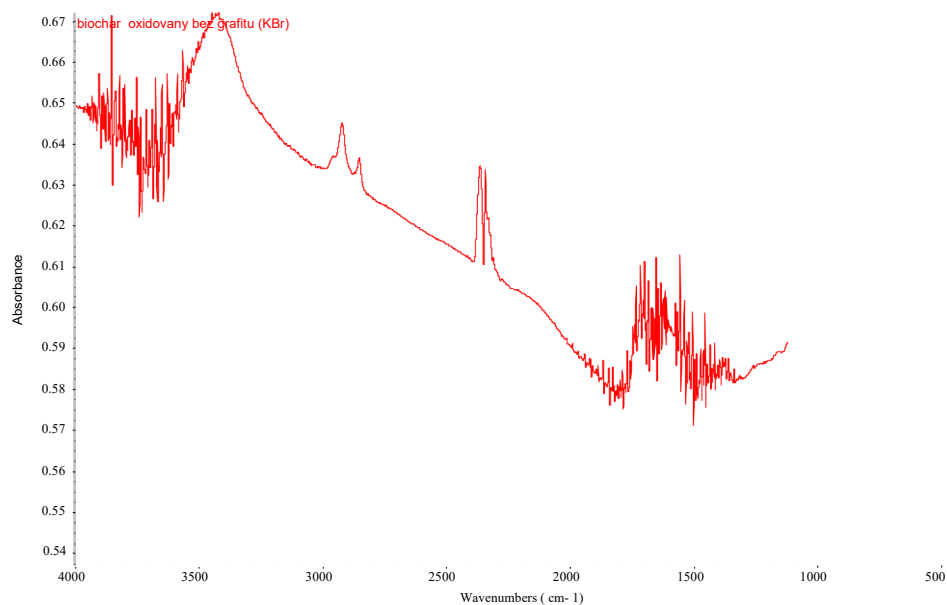

*Obr. S9: IR- spektrum Biochar oxidovaný bez grafitu (kap. 2.1)*

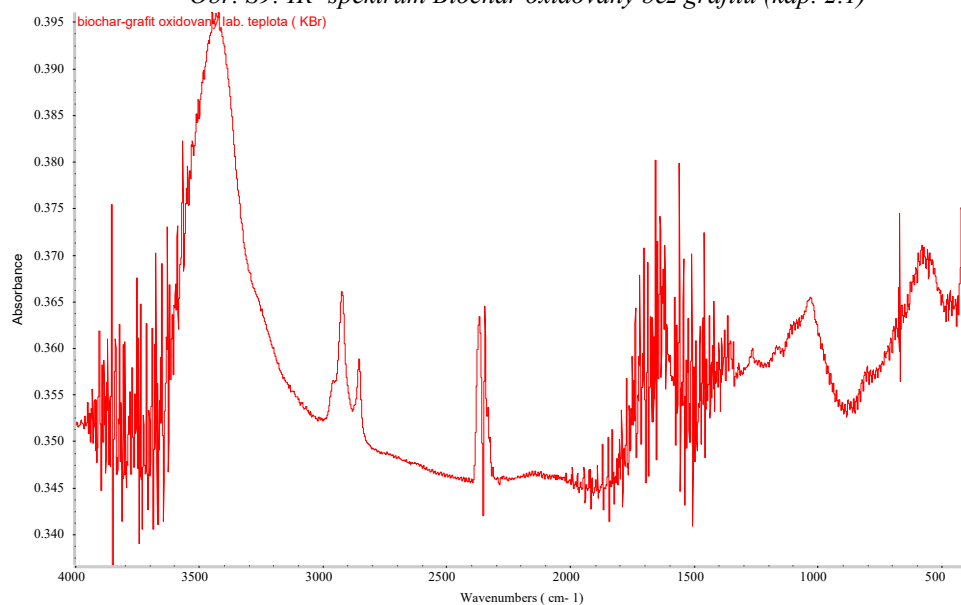

*Obr. S10: IR-spektrum Biochar-grafit oxidovaný dlouhodobě při laboratorní teplotě (kap. 2.2)*

Ramanova spektra

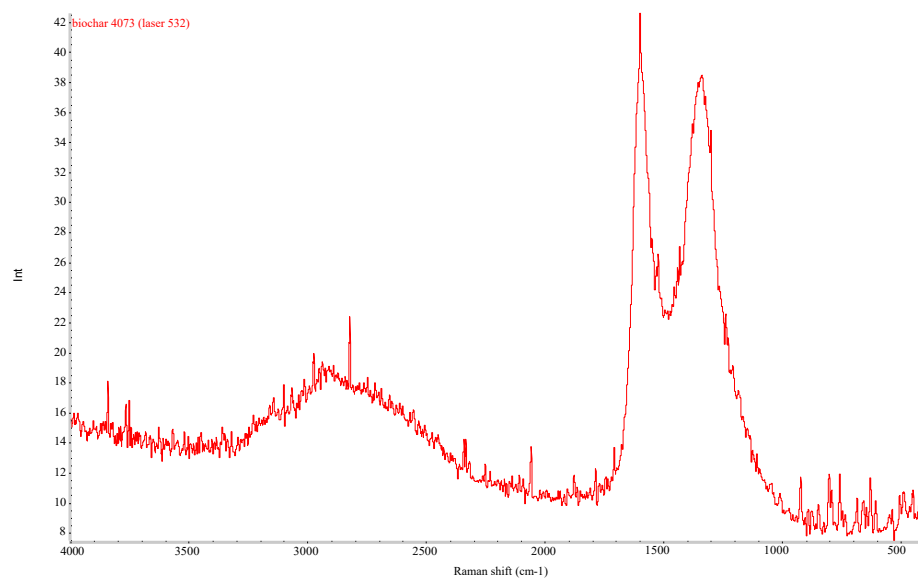

*Obr. S11: Ramanovo spektrum Biochar 4073(kap. 1.1.)*

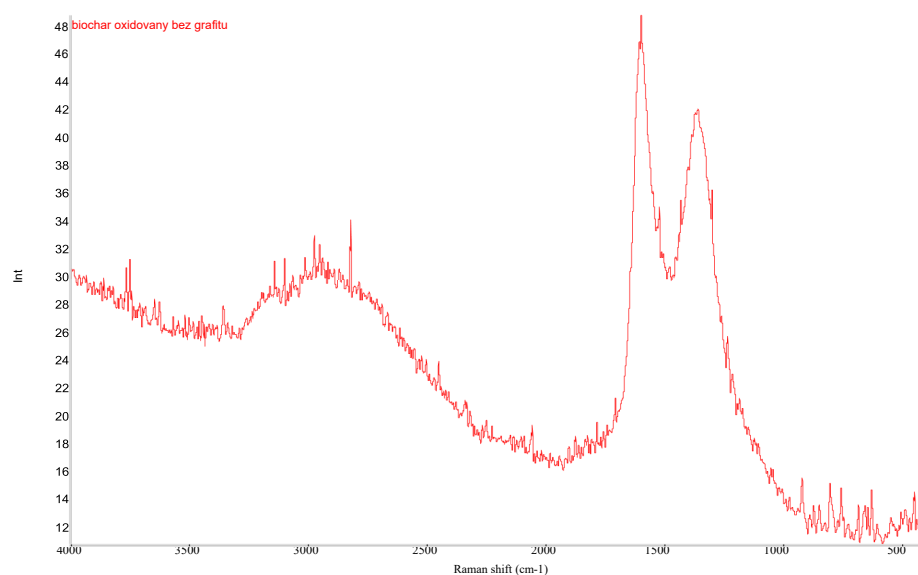

*Obr. S12: Ramanovo spectrum Biochar oxidovaný bez grafitu (kap. 2.1)*

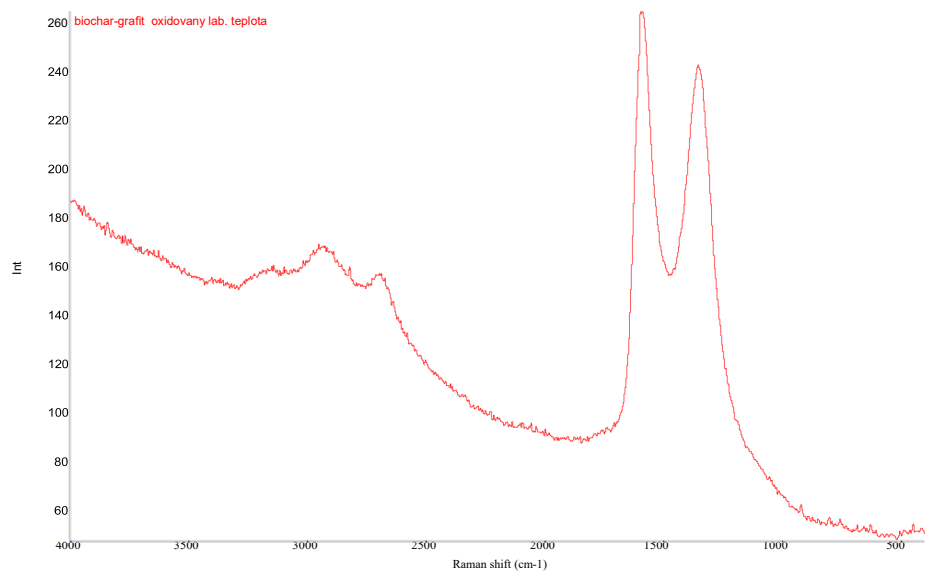

*Obr. S13: Ramanovo spectrum Biochar-grafit oxidovaný dlouhodobě při lab. teplotě (kap.2.2)*

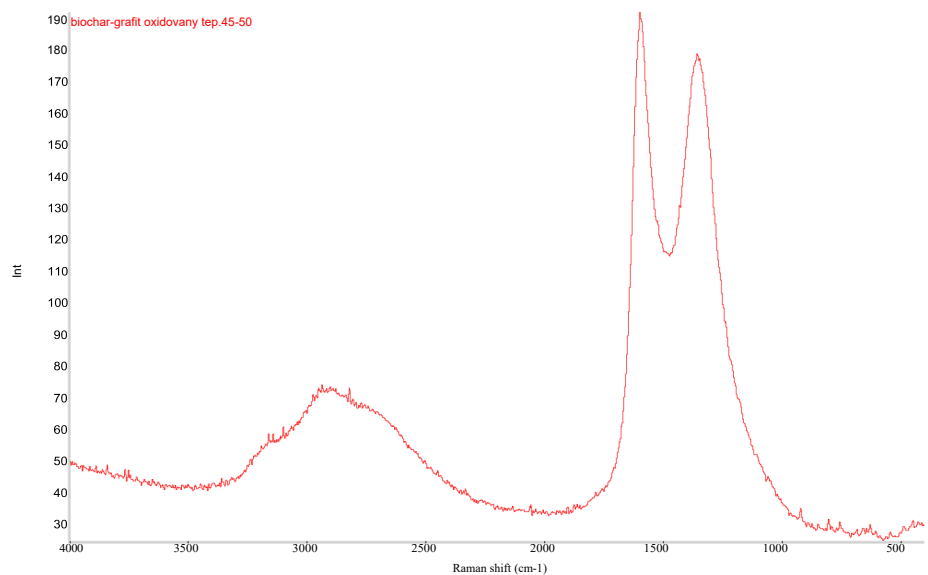

*Obr. S14: Ramanovo spectrum Biochar-grafit oxidovaný při tep. 45-50 °C (kap.2.3)*

### 3 Adsorpční schopnosti biocharu

Biochar včetně jeho modifikovaných verzí (po fyz. a chem. modifikaci) slouží jako výkonný adsorbant těžkých kovů a organických polutantů (včetně specifických jako jsou antibiotika, pesticidy, aromáty) v odpadních vodách či zemědělské půdě. (1,2,3).

My jsme testovali absorpční schopnosti biocharu 4073 ve formě prášku a to vůči odpadním vodám z rafinérie Slovnaft a.s. byla testována hmotnostní a časová závislost a byla porovnávána s účinností vůči CHSCr a NEL aktivnímu uhlí (AU). Další způsob testování biocharu, či jeho hybridních sloučenin proběhlo na půdě Státního ústavu jaderné, chemické a biologické ochrany v.v.i. Kamenná a to stanovením rezistenční doby (průniková doba).

Jedná se o časový interval, který uplynul od počátku působení zkušební chemikálie na materiál do okamžiku, kdy se tato chemikálie objeví na rubové straně materiálu v požadovaném množství. Ke studiu odolnosti ochranných materiálů pro bojové chemické látky je jako testovací látka standardně používán sírový yperit (HD).

Pro hodnocení chemické odolnosti materiálu jsme použily akreditovanou metodiku SÚJCHBO, v.v.i. a zařízení Carousel - jde o stanovení ochranné účinnosti materiálu proti průniku testovací chemické látky, tzv. průnikové době (ČSN ISO 6529), označované také jako rezistenční doba (RD) = **kvantitativní metoda**.

#### 1.1 Hmotnostní a časová závislost vůči odpadním vodám Slovnaft a.s.

Z průmyslových odpadních vod (ČOV) rafinérie Slovnaft, a.s. se sídlem v Bratislavě (rafinersko-petrochemická společnost) byl pro zkoušky vybrán stupeň čištění odpadních vod - Mechanický stupeň čištění VSTUP. Vzorek byl zpracován v laboratořích Slovnaft a.s., byly provedeny zkoušky stanovení CHSKCr - chemické spotřeby kyslíku (oxidační činidlo dichroman) a stanovení NEL - nepolárních extrahovatelných látek.



Byl použit biochar šarže 4073 a AU pro chromatografii 0,3 - 0,5 mm Merck, v navážkách na 1 litru odpadní vody 0,3; 0,5; 0,7; 1,0; 1,5 a 1,7 gramu. Jednotlivé směsi odpadních vod a biocharu či AU byly smíchány a míchány 2 hodiny na třepačce otáčky 280 rpm (Heidolph Promax 2020), následně byly směsi přefiltrovány přes papírový filtr a byly u filtrátu provedeny rozборы s výsledky uvedenými v Tabulce 1. Získali jsme hmotnostní sorpční křivku (vztažená k poměru množství odpadní voda/biochar či AU). Stejným postupem jsme provedli i měření časové závislosti navážky 1g biocharu. U vybraných šarží byly získané filtrační koláče sušeny 5 dní při laboratorní teplotě a po stažení z filtračního papíru následovala jejich analýza FT-IR a TGA,DSC.

*Tabulka S1: Výsledky CHSK a NEL u vzorku odpadní vody před a po sorbování biocharem a AU*

| Vzorek                                       | CH                  | Cr         | NE   |            |
|----------------------------------------------|---------------------|------------|------|------------|
|                                              | mgO <sub>2</sub> /l | Účinnost % | mg/l | Účinnost % |
| Mechanický stupeň – vstup                    | 142                 | 0          | 18,6 | 0          |
| 1. Mechanický stupeň – vstup + 0,3g biocharu | 49                  | 65,5       | 0,18 | 99,0       |
| 2. Mechanický stupeň – vstup + 0,5g biocharu | 50                  | 64,8       | 0,20 | 98,0       |
| 3. Mechanický stupeň – vstup + 0,7g biocharu | 44                  | 69,0       | 0,28 | 98,5       |
| 4. Mechanický stupeň – vstup + 1,0g biocharu | 33                  | 76,8       | 0,18 | 99,0       |
| 5. Mechanický stupeň – vstup + 1,5g biocharu | 29                  | 79,0       | 0,32 | 98,3       |
| 6. Mechanický stupeň – vstup + 1,7g biocharu | 22                  | 84,5       | 0,13 | 99,3       |
| 1.Mechanický stupeň – vstup + 0,3g AU        | 90                  | 36,6       | 4,40 | 76,3       |
| 2.Mechanický stupeň – vstup + 0,5g AU        | 85                  | 40,1       | 3,17 | 83,0       |
| 3.Mechanický stupeň – vstup + 0,7g AU        | 81                  | 42,0       | 4,30 | 76,9       |
| 4.Mechanický stupeň – vstup + 1,0g AU        | 44                  | 69,0       | 1,86 | 90,0       |
| 5.Mechanický stupeň – vstup + 1,5g AU        | 37                  | 73,9       | 2,37 | 87,3       |
| 6.Mechanický stupeň – vstup + 1,7g AU        | 42                  | 70,4       | 3,65 | 80,4       |
| Mechanický stupeň – vstup + 1,0g biocharu    |                     |            |      |            |
| 1.t - 10min                                  | 36                  | 74,6       | 0,65 | 65,1       |
| 2.t - 20min                                  | 36                  | 74,6       | 0,32 | 82,8       |
| 3.t - 30min                                  | 31                  | 78,2       | 0,15 | 99,2       |
| 4.t - 40min                                  | 34                  | 76,1       | 0,31 | 98,3       |
| 5.t - 50min                                  | 26                  | 81,7       | 0,27 | 98,5       |
| 6.t - 60min                                  | 36                  | 74,6       | 0,29 | 98,4       |

U sorpce kyslíku - chemická spotřeba kyslíku (CHSKCr), který vypovídá o celkovém obsahu organických (oxidovatelných) látek ve vodě byla účinnost u biocharu maximálně 84,5 % a byla vyšší než u AU a která dosáhla maximální hodnoty 73,9 %. Výsledky účinnosti sorpce kyslíku biocharem v závislosti na čase jsou vyrovnané a s časem nestoupá.

U sorpce nepolárních extrahovaných látek (NEL) u celé hmotnostní řady biocharu byla účinnost téměř 100 % (98,0-99,3) a byla vyšší než u hmotnostní řady AU. Hodnoty účinnosti sorpce kyslíku AU jsou proměnlivé a dosáhla maximální hodnoty 90,0 %.

Výsledky účinnosti sorpce NEL biocharu v závislosti na čase rostou s časem do 30 min, poté dojde k ustálení a účinnost sorpce byla téměř 100 %.

### 1.1.1 Termogravimetrická analýza vzorků po sorpci

Mírně jiný tvar křivky DSC při rozkladu byl zaznamenán u biocharu, který byl získán po adsorpci vybraných filtračních koláčů u vybraných šarží (viz Tabulka č. 1). Hlavní maximum nemá výrazný vlnovitý charakter jako byl u výchozího biocharu, viz **obr. č.** Biochary z různých šarží mají posunutá teplotní maxima rozkladu exoefekty, nejnižší maximum má biochar z šarže č. 3, při 669,7°C, šarže č. 1 má vyšší teplotu maxima 691 °C a v podstatě stejná hodnota byla naměřena u šarže 6 a to 695 °C.

U aktivního uhlí ze šarže 6 začíná pokles hmotnosti od teploty 130°C s dílčím exoefektem při 341 °C, který přechází plynule k hlavnímu exoefektu s maximem při 676 °C. Rozklad původního aktivního uhlí začíná až nad teplotou 390°C, váhový úbytek se vyskytuje v teplotním rozmezí 390-720°C s maximem při 682°C.

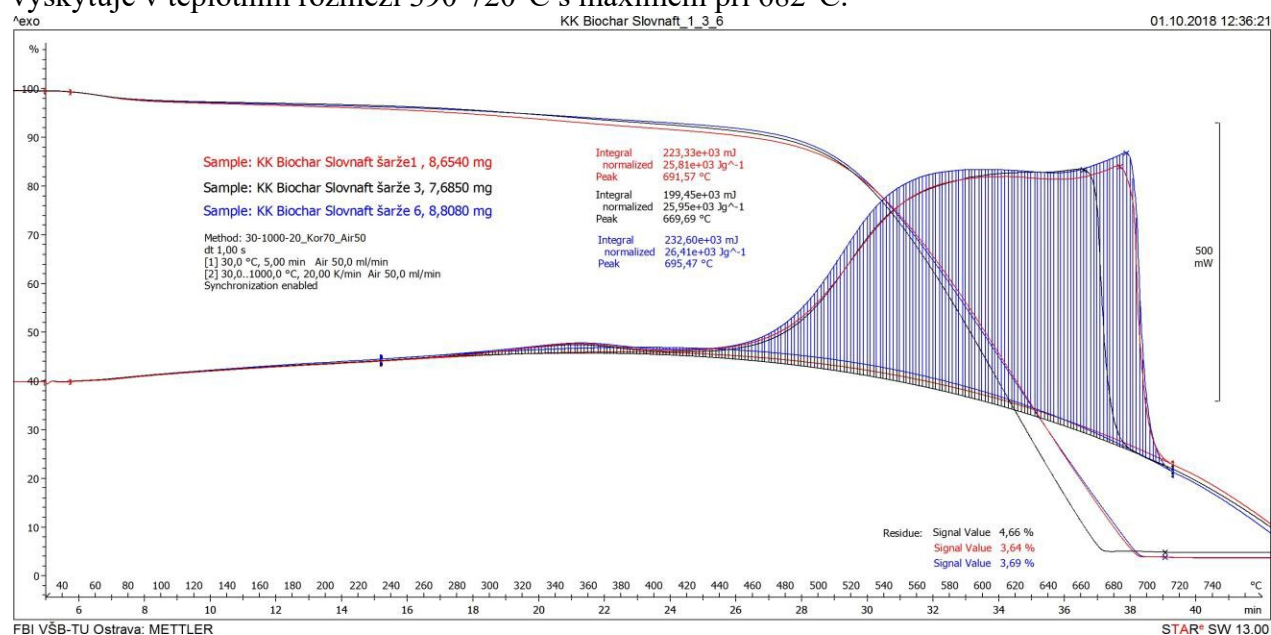

Obr. S15: TGA A DSC po sorbování v odpadních vodách rafinérie (mechaniky VSTUP) biochar šarže 1,3,6 viz adsorpce-Tabulka S1

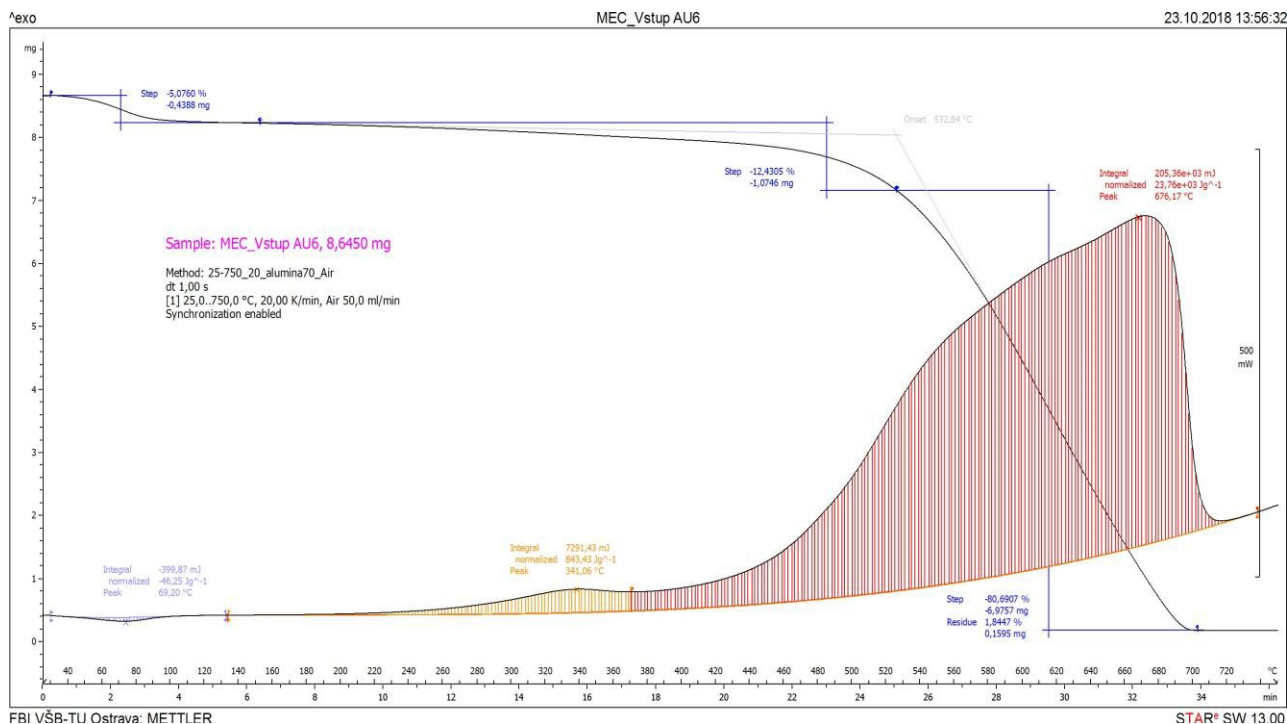

Obr. S16: TGA A DSC po sorbvání v odpadní vodách rafinérie (mechaniky VSTU) aktivního uhlí 6

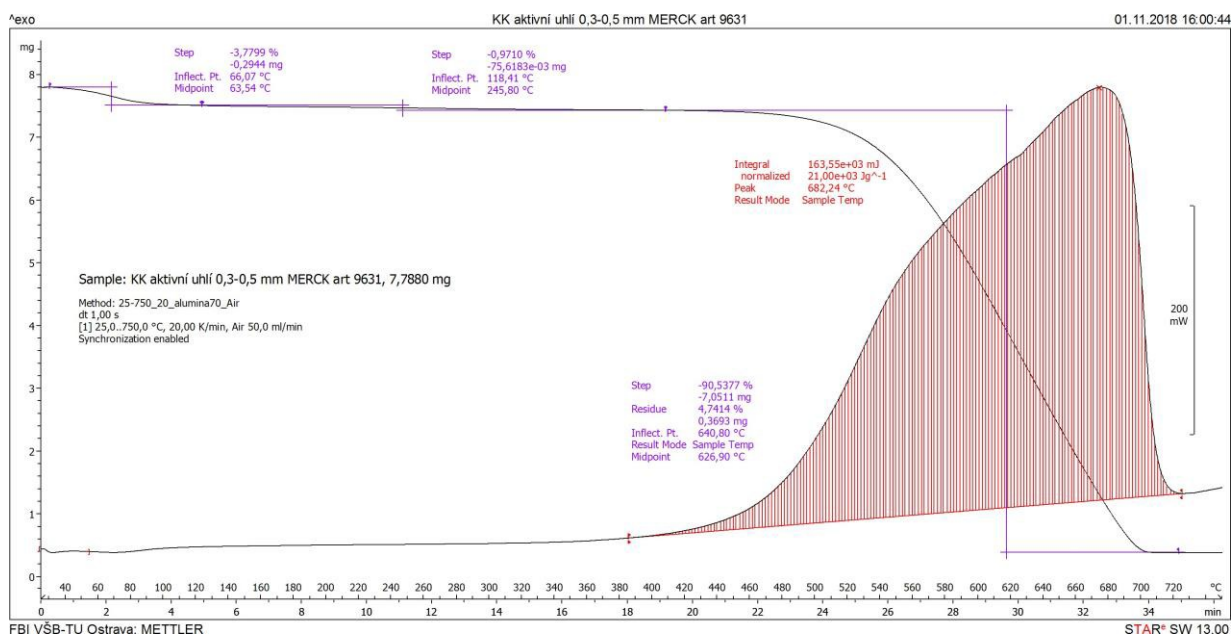

Obr. S17: TGA a DSC aktivního uhlí

### 1.1.2 Identifikace funkčních skupin pomocí IR-spektroskopie

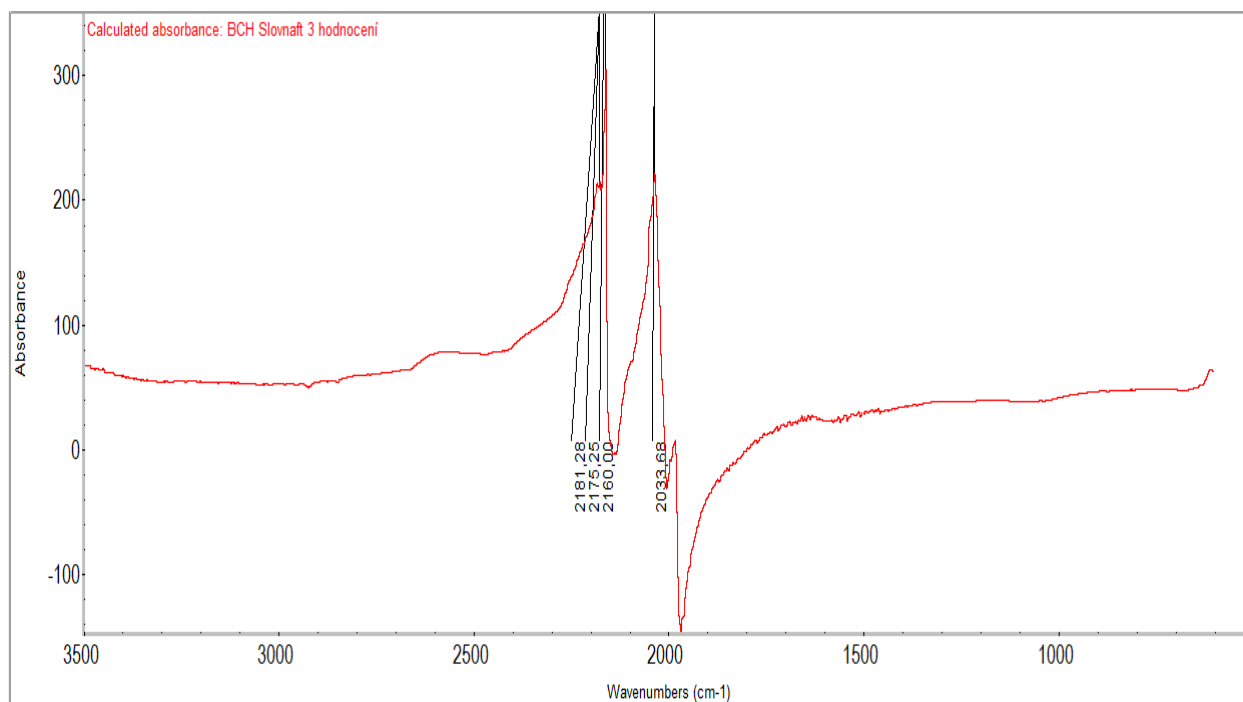

Obr. S18: FT-IR po sorbování v odpadních vodách rafinérie (mechaniky VSTUP) biochar šarže 3 viz adsorpce

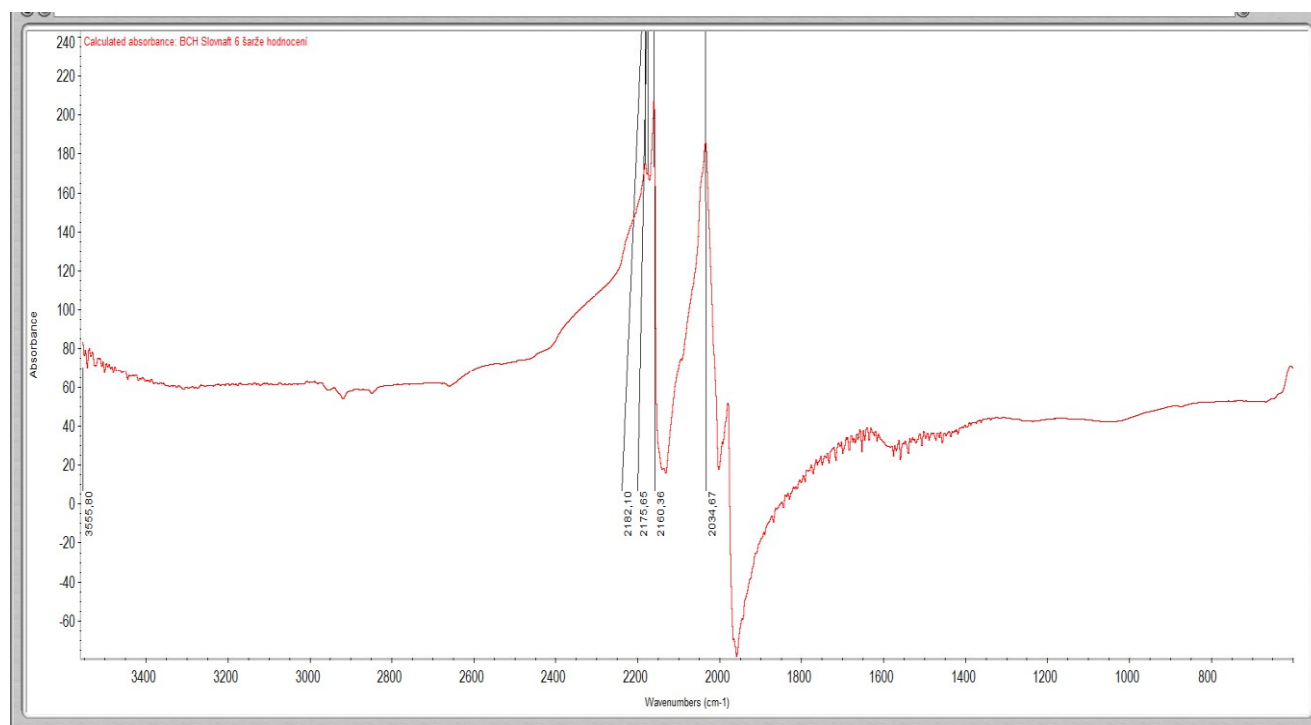

Obr. S19: FT-IR po sorbování v odpadních vodách rafinérie (mechaniky VSTUP) biochar šarže 6 viz adsorpce

Analýza byla provedena na IR spektrometru s Fourierovskou transformací - Nicolet iS10 ((Thermo Scientific) v uspořádání pro ATR metodu.

Přístroj je ovládán řídicím programem OMNIC, který je používán také při editaci a vyhodnocování spekter.

Pevné vzorky v práškovém stavu byly nanесeny na měřicí krystal (diamant) umístěný v centru podkladové destičky nástavce ATR a přitlačeny přitlačkou. Tlak přitlačky má vliv na generované spektrum, proto bylo měření opakováno pro získání shodných spekter.

Měření probíhá ve střední oblasti IR záření v rozsahu 4000 – 400 cm<sup>-1</sup>, ale spektra při použití metody ATR jsou ukončena v oblasti kolem 600 cm<sup>-1</sup>. Každé měření je vytvořeno z 64 skenů při rozlišení 4 cm<sup>-1</sup>

Před interpretací spekter hodnocených vzorků s cílem identifikovat funkční skupiny byla obě spektra upravena následujícím způsobem:

1. Výrazný pík oxidu uhličitého v oblasti 2400-2270 cm<sup>-1</sup>, s maximy 2358 a 2339 cm<sup>-1</sup> u vzorku BCH 3 a 2352 a 2323 cm<sup>-1</sup> u vzorku BCH 6, byl vymazán a nahrazen rovnou linií
2. Byla provedena korekce na ATR metodu
3. Byla provedena automatická korekce základní linie

V následující tabulce jsou uvedeny hodnoty zjištěných píků funkčních skupin obsahujících vazbu C-H s návrhem interpretace.

Tabulka S2: Porovnání vlnočtů charakterizující vybrané funkční skupiny C-H s píky nalezenými analýzou FTIR spekter

| Funkční skupiny         | Vzorek 3                          |           | Vzorek 6                          |           |
|-------------------------|-----------------------------------|-----------|-----------------------------------|-----------|
| (cm <sup>-1</sup> )     | Poloha maxima (cm <sup>-1</sup> ) | Intenzita | Poloha maxima (cm <sup>-1</sup> ) | Intenzita |
| -OH (3500-3100)         | bez pásu                          |           | bez pásu                          |           |
|                         |                                   |           |                                   |           |
| C-H aromáty (3050-2950) | 2973,36                           | 0,0081    | 2979,71                           | 0,0068    |
|                         | 2980,78                           | 0,0081    | 2992,26                           | 0,0068    |
|                         | 2990,90                           | 0,0081    | 3002,47                           | 0,0069    |
|                         | 3010,47                           | 0,0081    | 3011,14                           | 0,0069    |
|                         |                                   |           |                                   |           |
| C-H alkany (2980-2850)  | 2872,06                           | 0,0083    |                                   |           |
|                         |                                   |           | 2895,44                           | 0,0069    |
|                         | 2914,05                           | 0,0083    | 2913,76                           | 0,0070    |
|                         | 2946,05                           | 0,0082    | 2946,59                           | 0,0069    |
|                         | 2973,36                           | 0,0081    |                                   |           |
|                         | 2980,78                           | 0,0081    | 2979,71                           | 0,0068    |
|                         |                                   |           |                                   |           |
| C-H alkiny (3300)       | 3269,02                           | 0,0079    | 3270,75                           | 0,0069    |
| C-trojná C (2250-2100)  | 2114,73                           | 0,0069    | 2114,35                           | 0,0064    |
|                         |                                   |           |                                   |           |

|                        |          |  |          |  |
|------------------------|----------|--|----------|--|
| C-H alkeny (3100-3020) | bez pásu |  | bez pásu |  |
|------------------------|----------|--|----------|--|

Z tabulky vyplývá, že struktura hodnocených vzorků obsahuje pravděpodobně uhlíky spojené do kruhu a alifatické metylové a methylenové skupiny. Nelze vyloučit přítomnost trojné vazby mezi uhlíky. Ve struktuře nebyly zjištěny hydroxylové skupiny.

Vzdušná vlhkost se silně projevowała v oblastech nad 3500 cm<sup>-1</sup> a v oblasti 1900-350 cm<sup>-1</sup>.

Dále byl zahájen rozbor vazeb mezi uhlíkem a kyslíkem. Doposud získané výsledky jsou uvedeny v následující tabulce.

Porovnání vlnočtů charakterizující vybrané funkční skupiny C -O s píky nalezenými analýzou FTIR spekter

| Funkční skupiny<br>(cm <sup>-1</sup> ) | Vzorek 3<br>Poloha maxima<br>(cm <sup>-1</sup> ) | Intenzita     | Vzorek 6<br>Poloha maxima<br>(cm <sup>-1</sup> ) | Intenzita |
|----------------------------------------|--------------------------------------------------|---------------|--------------------------------------------------|-----------|
| C=O                                    | 1755                                             |               | Široký pás<br>1706-1790                          |           |
| Kolem 1700                             | 1720                                             |               |                                                  |           |
|                                        |                                                  |               |                                                  |           |
| C-O (1200 - 900)                       | 1173,10                                          | 0,0089        | 1180,18                                          | 0,0075    |
|                                        |                                                  |               | 1202,93                                          | 0,0075    |
|                                        | 1214,99                                          | 0,0089        |                                                  |           |
|                                        | 1257,30                                          | 0,0089        |                                                  |           |
|                                        |                                                  |               |                                                  |           |
|                                        |                                                  |               |                                                  |           |
|                                        | 870,72                                           | 0,0086        | 871,93                                           | 0,0076    |
|                                        |                                                  |               | 987,57                                           | 0,0080    |
|                                        |                                                  |               | 995,42                                           | 0,0080    |
|                                        |                                                  |               | 1006,27                                          | 0,0080    |
|                                        |                                                  |               | 1010,35                                          | 0,0080    |
|                                        |                                                  |               | 1118,25                                          | 0,0076    |
|                                        | 1014,61                                          | 0,0094        |                                                  |           |
|                                        | <b>1033,06</b>                                   | <b>0,0094</b> |                                                  |           |
|                                        | 1048,49                                          | 0,0093        |                                                  |           |

Pík s nejvyšší intenzitou může být spojován se strukturou celulozy nebo hemicelulozy (hexoza). Jak je patrné, u vzorku 3 je molekulární struktura zachována, zatímco u vzorku 6 není.

Analýza není ukončena, spektra je nutné ještě dále upravit a zpracovat.

### 1.1.3 Spalné teplo vzorku po sorpci

Biochar 4073 po absorpci (Mechanika vstup) vychází ve dvou měřeních 31,42 a 31,35 MJ/kg.

## 1.2 Adsorpce na zařízení v SÚJCHBO v.v.i a VUBP v.v.i.

Na základě předchozích zkušeností jsme si nechali připravit na katedře Netkaných textilií TU-Liberec kompozitní textilní materiál biochar se sorbentem procesem laminace. Zejména šlo zachování soudržnosti jednotlivých vrstev při manipulaci, o zachování textilního vzhledu, omaku a objemu tedy dostatečné tloušťky materiálu.

Tabulka S3: Materiály použité pro složení kompozitu s Biocharem.

| Popis materiálu - zkratka | Plošná hmotnost      | Složení materiálu |
|---------------------------|----------------------|-------------------|
| Spunbond - SB             | 18 g/m <sup>2</sup>  | PE/PP             |
| Meltblown - MB            | 180 g/m <sup>2</sup> | PP                |
| Vpichovaná - VP           | 80 g/m <sup>2</sup>  | PES               |

Výroba materiálů:

Laminace 130°C; čas průchodu vzorku 14sec; rychlost 2,3m/min; přítlak 0 N/cm

Složení kompozitního materiálu:

Vzorek A: SB,VP,MB,VP, SB do materiálů VP dodáno celkem 1,6g Biocharu

Vzorek B: SB,VP,MB,VP, SB do materiálů VP dodáno celkem 3 g Biocharu

Vzorek C: SB,VP,MB,VP, SB do materiálů VP dodáno celkem 2g Biocharu

Vzorek D: SB,VP,MB,VP, SB do materiálů VP dodáno celkem 1g Biocharu

Vzorek E: SB,VP,MB,VP, SB do materiálů VP dodáno celkem 2,6g Biocharu

Prášek byl přesně odvážen a aplikován na materiál vpichovaná textilie VP. Homogenizace probíhala strojním nánosem a poté štětcem. Došlo tak k velice dobrému nanesení prášku na materiál. Následně byla vpichovaná textilie přehnuta (napůl) a doprostřed byl vložen MB (viz Obr. X). Celé toto bylo překryto vrstvou spunbond a zalaminováno. Velikost připraveného materiálu 210 x 150 mm (viz ObrX).

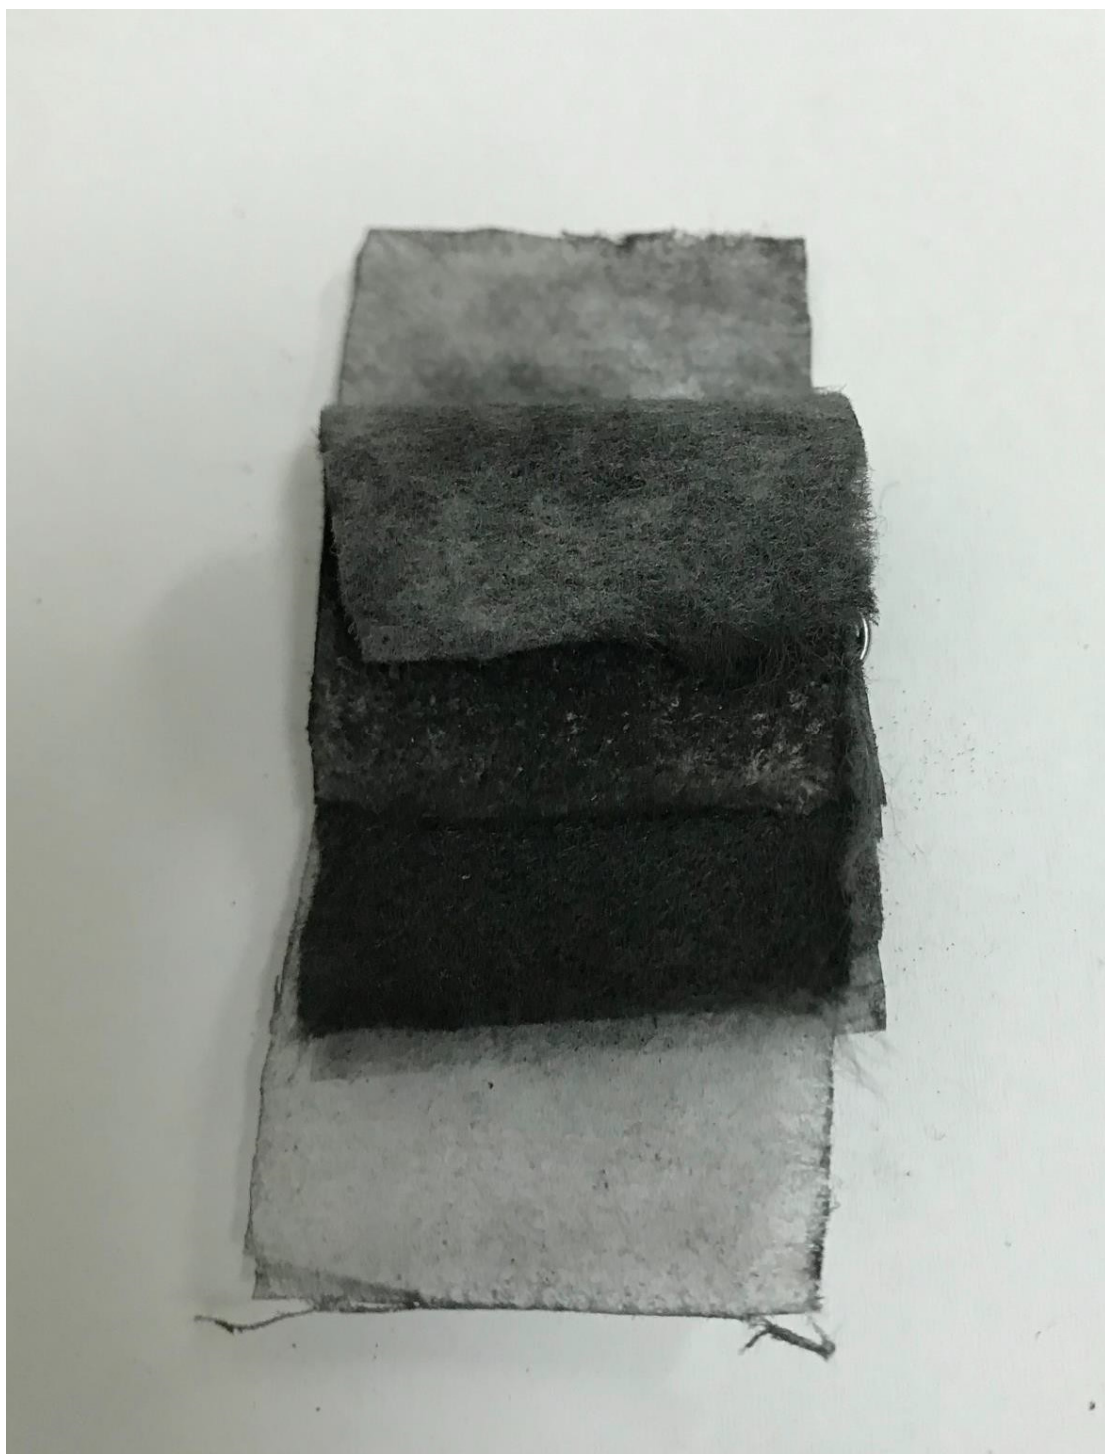



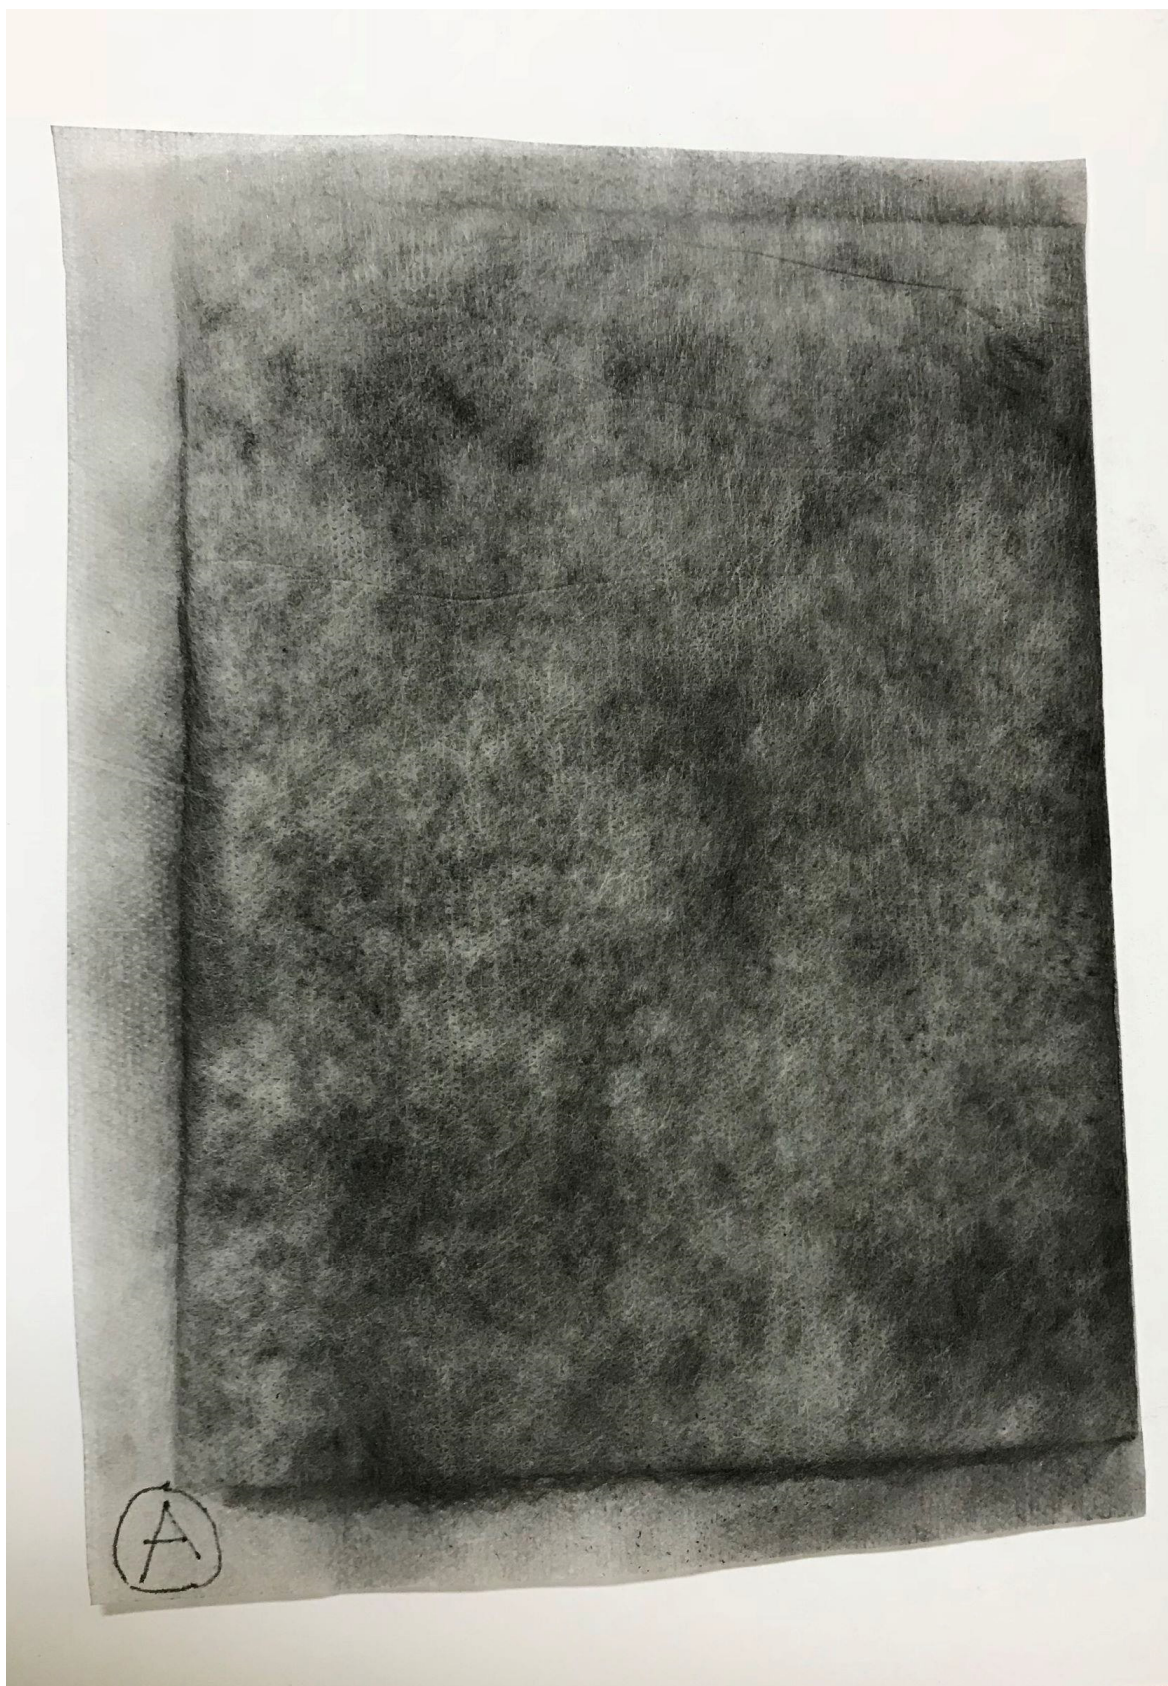

*Obr. S20: Testy sorpce na různých vzorcích*  
Pro testy sorpce byly použity vzorky C, D, E,

vzorek B jsme podrobili testu dle ČSN EN 149:2002 + A1:20009 Ochranné prostředky dýchacích orgánů na zkušebním zařízení VÚBP v.v.i. Praha a vzorek A byl ponechán jako rezerva.

#### **Podmínky testování na půdě VÚBP**

##### **Použité přístroje**

Zkušební zařízení pro stanovení dýchacích odporů INSPEC

Manometr GDH 200-07

Rotametr Yokogawa P052

Rotametr Yokogawa P161

Stopky Ruhla

Teploměr typ Centigrade 0,1

Přístroj na zkoušení filtrů aerosolem parafinového oleje LORENZ typ BIA

Přístroj na zkoušení aerosolem NaCl fy MOORE'S typ 1100

Metrologické zajištění

Metrologické zajištění přístrojů je prováděno v souladu s metrologickým řádem VÚBP-ZL.

*Tabulka S4: Určení dýchacích odporů*

| Vzorek   | Odpor (Pa)   |              |
|----------|--------------|--------------|
|          | při 30 l/min | při 95 l/min |
| Vzorek B | 398          | 1345         |

*Tabulka S5: Stanovení průniku aerosolu, a) Zkouška parafinovým olejem.*

| Vzorek   | Průnik (%) |
|----------|------------|
| Vzorek B | 11,00      |

Průnik parafinového oleje po 3 minutách, průtok 95 l/min.

*Tabulka S6: Stanovení průniku aerosolu, a) Zkouška chloridem sodným*

| Vzorek   | Průnik (%) |
|----------|------------|
| Vzorek B | 6,57       |

Průnik NaCl po 3 minutách. Průtok 45 l/min.

Vyhodnocení: Kompozitní materiál je dobře prodyšný, dýchací odpor při 30 l/min i při 95 l/min je nízký. Záchyt parafinového oleje a aerosolu NaCl byl u kompozitního materiálu vysoký více než 89 %. Materiál je prodyšný a lze na základě uvedených zkoušek předpokládat vysokou sorpční schopnost.

#### **Podmínky testování na SÚJCHBO, v.v.i. Kamenná:**

Vzorky připravené na katedře Netkaných textilií TU-Liberec byly vloženy mezi spunbond a překryty silikonovou fólií, stabilizátorem vstupní koncentrace yperitu.

Povrch pak byl kontaminován yperitem (buď 5 x 0,5 µl kapkami yperitu nebo celoplošně fritou nasycenou yperitem). Výsledky jsou uvedeny v Tabulce S6.

*Tabulka S7: Hodnoty rezistenční doby yperitu*

| Sestava vrstveného systému | RDy / min           |                    |
|----------------------------|---------------------|--------------------|
|                            | Kontaminace kapkami | Kontaminace fritou |
| S                          | 2min45s             | <5                 |
| vzorek C                   | 132                 | 122                |
| vzorek D                   | 80                  | 68                 |
| vzorek E                   | 160                 | 147                |

### 1.2.1 Modifikace kompozitního materiálu s biocharem

Podmínky výroby materiálů s obsahem sorbentu biochar:

Laminace při 130 °C; čas průchodu vzorku laminační komorou 14 sec; rychlost průchodu laminační komorou 2,3 m/min; přítlak 0 N/cm<sup>2</sup>.

Tabulka S8: Materiály použité pro složení kompozitu s biocharem.

| Popis materiálu – zkratka        | Plošná hmotnost      | Složení materiálu |
|----------------------------------|----------------------|-------------------|
| Spunbond – SB                    | 18 g/m <sup>2</sup>  | PE/PP             |
| Meltblown – MB                   | 250 g/m <sup>2</sup> | PP                |
| Vpichovaná netkaná textilie – VP | 80 g/m <sup>2</sup>  | PES               |

Kompozitní materiál se skládá ze sedmi vrstev, sorbent biochar se nanášel pouze to vpichované netkané textilie. Velikost připraveného materiálu 210 x 150 mm.

Tabulka S9: Množství biocharu v jednotlivých vrstvách a na cm<sup>2</sup>.

| Vz. | SB | VP<br>g | MB | VP<br>g | MB | VP<br>g | SB | Celkem<br>biocharu/g | biochar<br>mg/cm <sup>2</sup> |
|-----|----|---------|----|---------|----|---------|----|----------------------|-------------------------------|
| 1.  | -  | 0,5     | -  | 1       | -  | 0,5     | -  | 2                    | 7,9                           |
| 2.  | -  | 1       | -  | 1       | -  | 1       | -  | 3                    | 9,5                           |
| 3.  | -  | 1,5     | -  | 1       | -  | 1,5     | -  | 4                    | 12,7                          |
| 4.  | -  | 2       | -  | 1       | -  | 2       | -  | 5                    | 15,9                          |

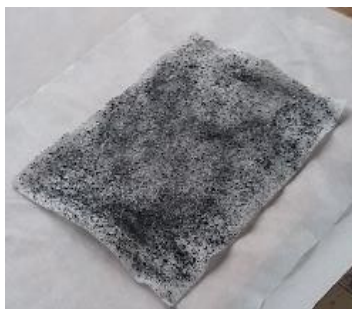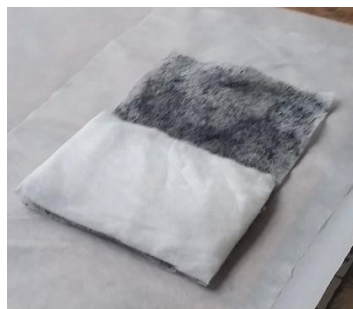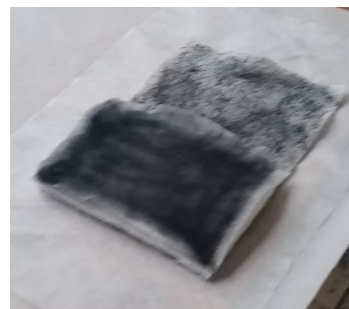

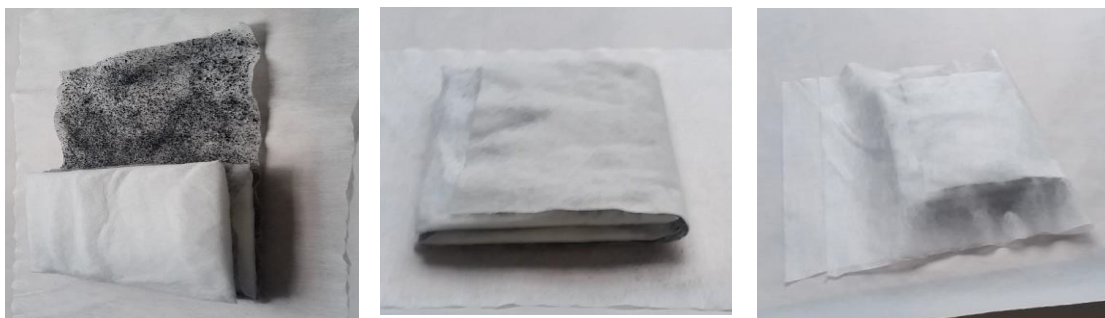

Obr. S21: Postup přípravy kompozitního materiálu

Vzorek 2 a 3 jsme podrobili testu dle ČSN EN 149:2002 + A1:20009 Ochranné prostředky dýchacích orgánů na zkušebním zařízení VÚBP v.v.i. Výsledky zkoušek určení dýchacího odporu a měření průniku vůči aerosolu NaCl a parafinového oleje jsou uvedeny v Tabulkách S 10 až 12.

Tabulka S10: Určení dýchacích odporů

| Vzorek   | Odpor / Pa   |              |
|----------|--------------|--------------|
|          | při 30 l/min | při 95 l/min |
| Vzorek 2 | 545          | 1915         |
| Vzorek 3 | 466          | 1532         |

Tabulka S11: Stanovení průniku aerosolu, a) Zkouška parafinovým olejem.

| Vzorek   | Průnik / % |
|----------|------------|
| Vzorek 2 | 2,80       |
| Vzorek 3 | 15,00      |

Průnik parafinového oleje po 3 minutách, průtok 95 l/min, průměr vzorku 10 cm.

Tabulka S12: Stanovení průniku aerosolu, b) Zkouška chloridem sodným

| Vzorek   | Průnik / % |
|----------|------------|
| Vzorek 2 | 2,76       |
| Vzorek 3 | 1,23       |

Průnik NaCl po 3 minutách, průtok 45 l/min, průměr vzorku 10 cm.

Kompozitní materiál je dobře prodyšný, dýchací odpor při 30 l/min i při 95 l/min je nízký. Záchyt parafinového oleje a aerosolu NaCl byl u kompozitního materiálu vysoký více než 85 %. Materiál je prodyšný a lze u něj předpokládat vysokou sorpční schopnost.

Vzorky 1 a 4 byly vloženy mezi spunbond a překryty silikonovou fólií, stabilizátorem vstupní koncentrace yperitu. Povrch pak byl kontaminován yperitem (buď 5 x 0,5 µL kapkami yperitu nebo celoplošně fritou nasycenou yperitem).

Výsledky rezistenční doby yperitu jsou uvedeny v Tabulce S13.

Tabulka S13: Hodnoty rezistenční doby yperitu



| Sestava vrstveného systému | RDy /min            |                    |
|----------------------------|---------------------|--------------------|
|                            | Kontaminace kapkami | Kontaminace fritou |
| S                          | 2min45s             | <5                 |
| vzorek 1                   | 90 min              | 88 min             |
| vzorek 4                   | > 20 h              | > 20 h             |

Vyhodnocení:

Vícevrstevnatý vzorek velikosti 150 x 210 mm obsahující 5 g biocharu ( $15,9 \text{ mg/cm}^2$ ) vzorek č.4 má  $RD_y$  vyšší než 20 hodin. Materiál, ale není poddajný/splývavý což je omezující pro jeho další použití.

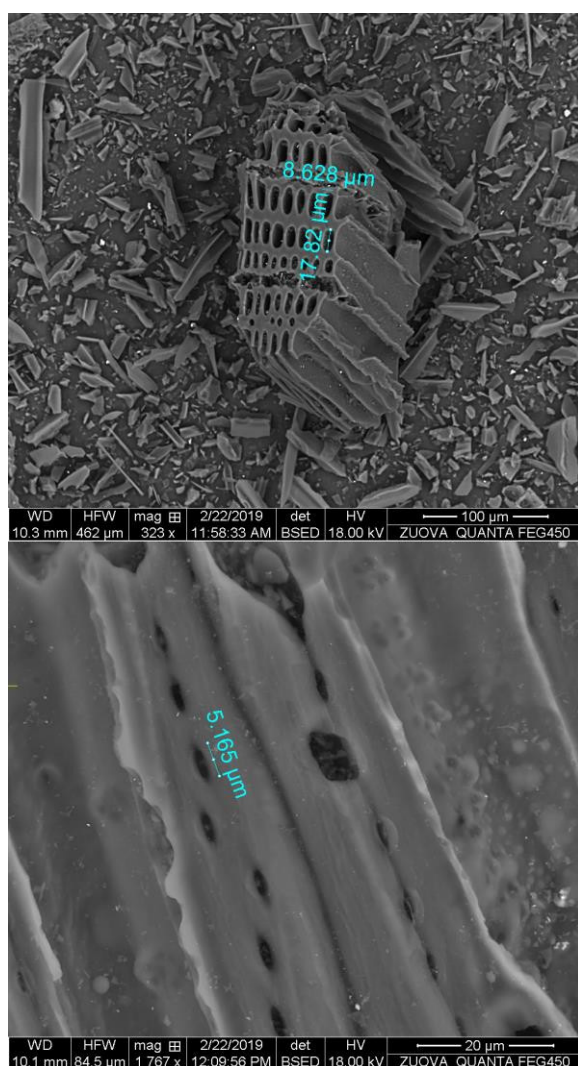

Obr. S22: SEM snímky vzorku Biochar 4073

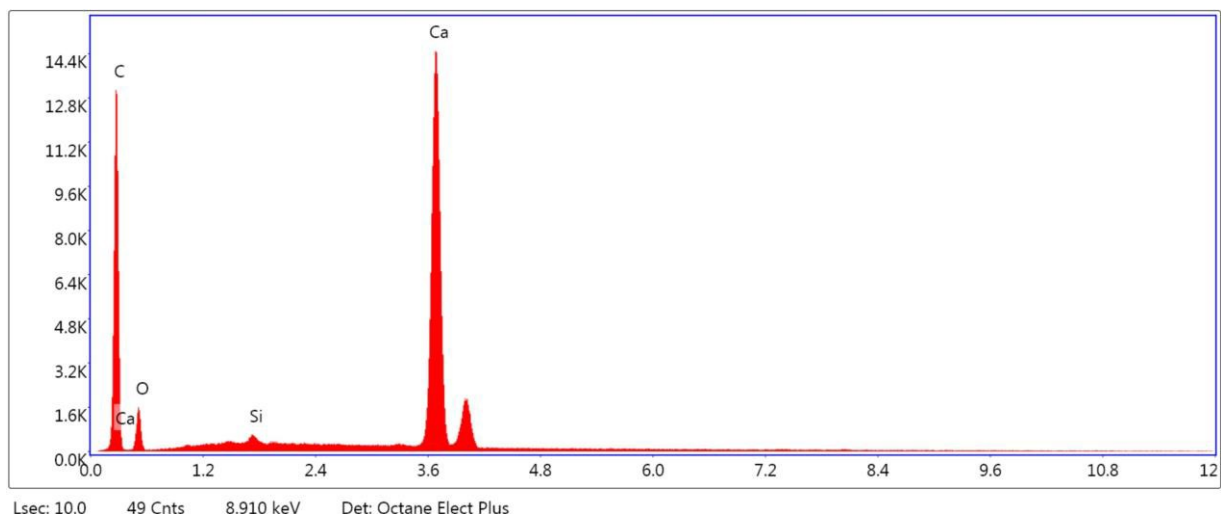

#### eZAF Smart Quant Results

| Element | Weight % | Atomic % | Net Int. | Error % | Kratio | Z      | A      | F      |
|---------|----------|----------|----------|---------|--------|--------|--------|--------|
| C K     | 35.77    | 58.32    | 5804.85  | 5.86    | 0.2203 | 1.0985 | 0.5605 | 1.0000 |
| O K     | 13.89    | 17.01    | 838.48   | 11.99   | 0.0139 | 1.0514 | 0.0952 | 1.0000 |
| SiK     | 0.39     | 0.27     | 229.77   | 12.90   | 0.0030 | 0.9556 | 0.8069 | 1.0080 |
| CaK     | 49.94    | 24.40    | 16085.75 | 1.72    | 0.4579 | 0.9016 | 1.0148 | 1.0021 |

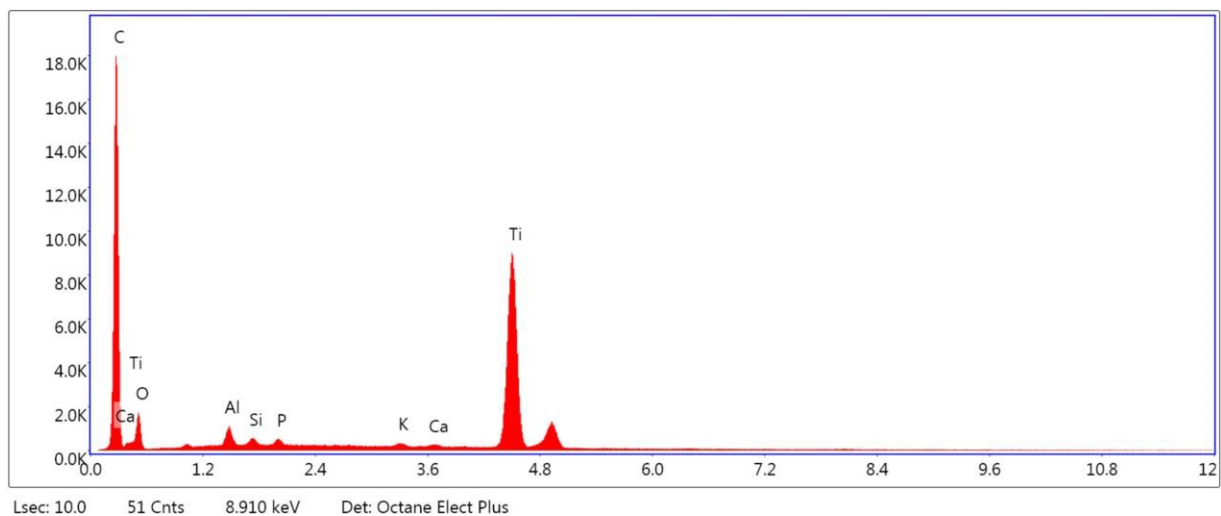

#### eZAF Smart Quant Results

| Element | Weight % | Atomic % | Net Int. | Error % | Kratio | Z      | A      | F      |
|---------|----------|----------|----------|---------|--------|--------|--------|--------|
| C K     | 52.95    | 75.15    | 9863.11  | 6.03    | 0.3147 | 1.0952 | 0.5426 | 1.0000 |
| O K     | 10.81    | 11.52    | 820.68   | 12.95   | 0.0114 | 1.0476 | 0.1011 | 1.0000 |
| AlK     | 0.88     | 0.56     | 529.74   | 7.37    | 0.0057 | 0.9310 | 0.6946 | 1.0037 |
| SiK     | 0.24     | 0.14     | 164.86   | 11.17   | 0.0018 | 0.9513 | 0.8007 | 1.0061 |
| P K     | 0.35     | 0.19     | 200.97   | 10.55   | 0.0028 | 0.9136 | 0.8806 | 1.0101 |
| K K     | 0.41     | 0.18     | 192.50   | 14.82   | 0.0038 | 0.8813 | 1.0056 | 1.0532 |
| CaK     | 0.36     | 0.15     | 147.67   | 17.72   | 0.0035 | 0.8972 | 1.0121 | 1.0740 |

|     |       |       |          |      |        |        |        |        |
|-----|-------|-------|----------|------|--------|--------|--------|--------|
| TiK | 34.00 | 12.10 | 10913.00 | 1.98 | 0.2830 | 0.8128 | 1.0180 | 1.0058 |
|-----|-------|-------|----------|------|--------|--------|--------|--------|

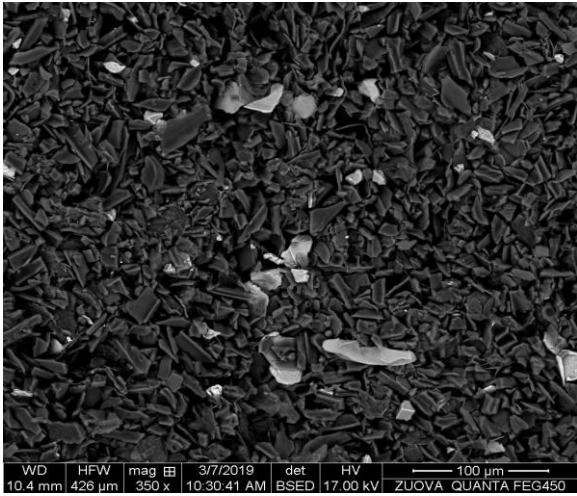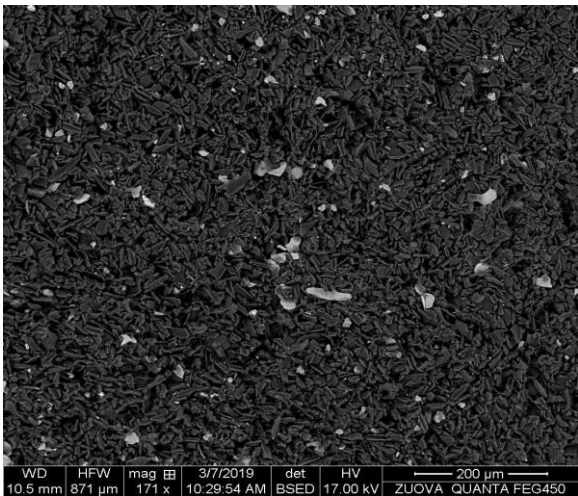

Obr. S23: SEM GO- Biochar- KClO3

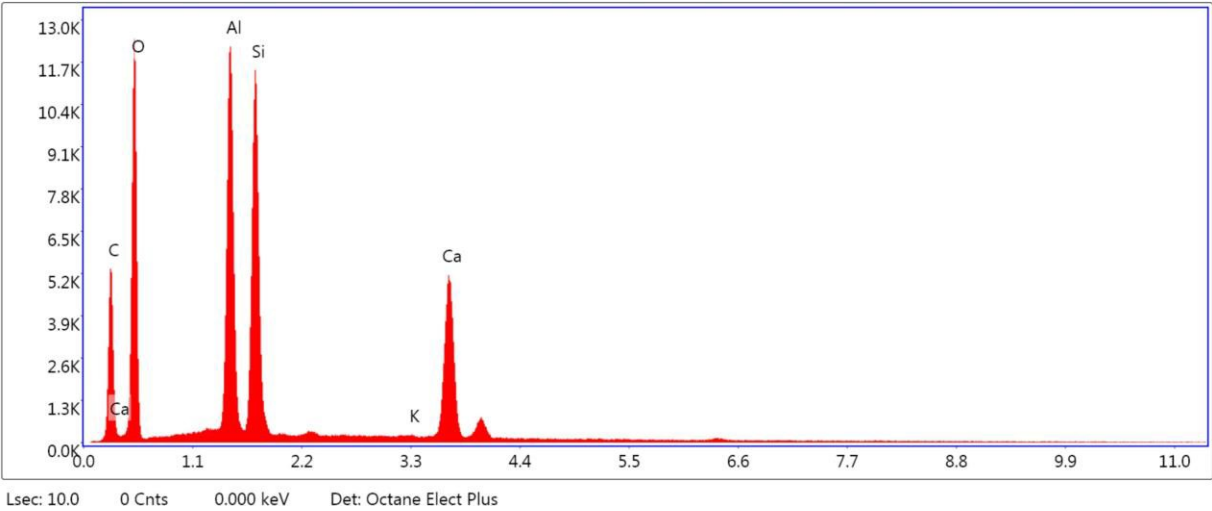

eZAF Smart Quant Results

| Element | Weight % | Atomic % | Net Int. | Error % | Kratio | Z      | A      | F      |
|---------|----------|----------|----------|---------|--------|--------|--------|--------|
| C K     | 22.85    | 34.35    | 2169.19  | 9.79    | 0.0548 | 1.0830 | 0.2215 | 1.0000 |
| O K     | 37.95    | 42.83    | 7154.86  | 9.39    | 0.0824 | 1.0340 | 0.2100 | 1.0000 |
| AlK     | 12.68    | 8.49     | 9526.66  | 3.93    | 0.0892 | 0.9160 | 0.7645 | 1.0046 |
| SiK     | 12.37    | 7.95     | 9101.21  | 4.05    | 0.0880 | 0.9355 | 0.7578 | 1.0035 |
| K K     | 0.11     | 0.05     | 55.33    | 40.58   | 0.0010 | 0.8645 | 0.9625 | 1.0384 |
| CaK     | 14.04    | 6.33     | 5658.32  | 2.19    | 0.1221 | 0.8797 | 0.9804 | 1.0086 |

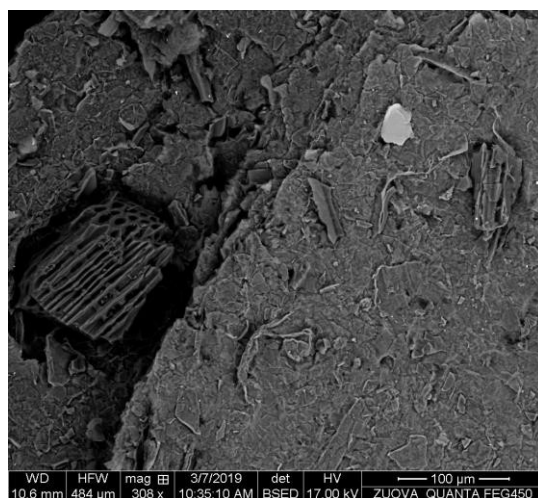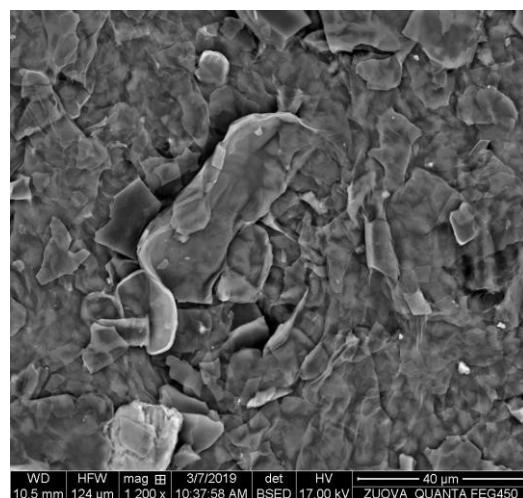

Obr. S24: SEM snímek GO-Biochar bez  $\text{NaNO}_3$

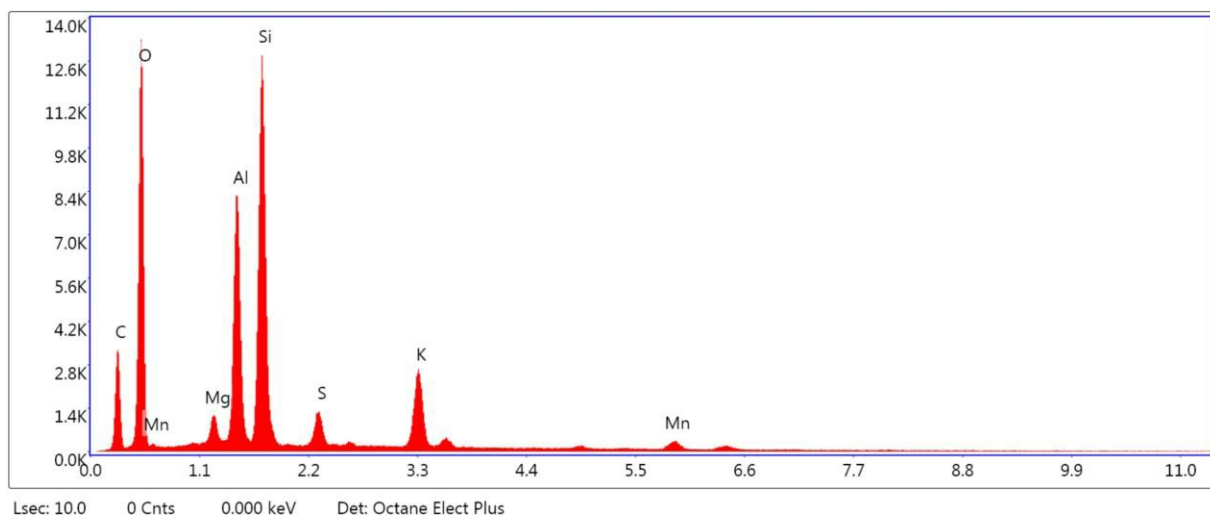

#### eZAF Smart Quant Results

| Element | Weight % | Atomic % | Net Int. | Error % | Kratio | Z      | A      | F      |
|---------|----------|----------|----------|---------|--------|--------|--------|--------|
| C K     | 23.31    | 34.42    | 1660.12  | 10.12   | 0.0488 | 1.0810 | 0.1936 | 1.0000 |
| O K     | 39.17    | 43.43    | 7679.99  | 8.92    | 0.1030 | 1.0319 | 0.2547 | 1.0000 |
| MgK     | 1.22     | 0.89     | 687.03   | 6.55    | 0.0074 | 0.9497 | 0.6387 | 1.0046 |
| AlK     | 10.03    | 6.60     | 6440.11  | 4.05    | 0.0703 | 0.9139 | 0.7624 | 1.0054 |
| SiK     | 15.73    | 9.93     | 10145.10 | 3.79    | 0.1143 | 0.9332 | 0.7764 | 1.0032 |
| S K     | 2.00     | 1.11     | 1013.76  | 4.89    | 0.0152 | 0.9127 | 0.8264 | 1.0075 |
| K K     | 6.61     | 3.00     | 2643.74  | 2.98    | 0.0549 | 0.8623 | 0.9529 | 1.0108 |
| MnK     | 1.93     | 0.62     | 370.26   | 5.38    | 0.0157 | 0.7668 | 1.0020 | 1.0544 |



### **1.3 Pokus sorpce fenolu na biocharu 4073, GO-Biocharu**

#### **Fenoly**

Tato látka, také známá pod svým triviálním názvem karbol, je jedovatá, krystalická (do 18° C, poté se stává kapalnou) a bezbarvá. Vyznačuje se svým klasickým dehtovým zápachem. Fenolové vody jsou připravovány smícháním kapalného fenolu s vodou, dokud nedosáhneme požadované koncentrace roztoku.

Literatura dokládá, že maximální sorpční kapacita se liší s použitým množstvím biocharu. V tomto případě se jedná o typ biocharu OP300, který vznikl pyrolýzou pomerančové slupky při 300° C. Bez použití fenolu se sorpční kapacita pohybovala okolo 11,3 mg/g, při použití 5000mg/l fenolu se zvýšila na 44,2 mg/g, pokud však dale byla zvýšena koncentrace, tak již k nárustu nedocházelo, naopak při použití 20 000 mg/l fenolu se sorpční schopnost snížila na 25,3 mg/g. Ideální množstvím je ta jeví hodnota 5000 mg/l.

### **1.4 Pokus sorpce na reálných odpadních vodách**

#### **Odpadní vody**

Tyto odpadní vody byly produktem lahudkářské výroby, která je zaměřena na pomazánky, saláty, aspiky, produkty z ryb, korbačiky a další marinované sýrové speciality. Hlavními složkami v těchto vodách pak byla sůl, ocet, mléčné tuky, salámové a rybí tuky, želatiny a aspiky. Odběr probíhal následujícím způsobem - z výroby odtékají odpadní a komunální vody do jednoho potrubí, ve kterém se promíchají a následně pokračují do lapolů, kde jsou oddělovány tuky. Z těchto lapolů byly odebrány vzorky odpadních vod. **Viz samostatná zpráva**

### **1.5 Pokus sorpce na slaných vodách**

**Viz bude samostatná zpráva**

### **1.6 Pokus sorpce na drogách a léčivech**

Viz samostatná zpráva

## Part B: Justification of the biochar choice and concentrations

**Předmět nabídky:** Analýza odpadních vod se specifickým zaměřením pomocí sorbentů na bázi biocharu a nebo jeho modifikací

**Vzorky Biocharu:** vzorek 1 (dodal Ing. Stloukal – Biochar 5/2019,  
4073) vzorek 2 (dodal Ing. Káňa – Biochar PRAu 0-5)

### Analýza odpadních vod

Pro testování byla odebrána voda z ČOV, ve které se stanovila léčiva. Ze získaných dat se vybralo několik analytů pro testování biocharu a dále byly vybrány 4 analyty (Diclofenac, Tramadol, Clarithromycin, Sulfamethoxazol) pro testování sorpční kapacity a pro pochopení reaktivity na biocharu.

Pro stanovení účinnosti odstraňování analytů byly zvoleny 2 navážky biocharu a to 0,5 g /1l a 1 g/1l. K naváženému biocharu byla přidána ČOV voda a v časových intervalech 30, 60 a 180 minut byl postupně odebrán vzorek vody ke stanovení analytů pomocí LC-MS.

Výsledky pro jednotlivé analyty jsou uvedeny v tabulce č. 1 pro biochar 4073, v tabulce č. 2 pro biochar PRAu a v grafu č. 1 pouze pro biochar 4073. Z tabulky č. 1 je patrné, že již po 30 minutách a navážce 0,5 g na litr je odstraněno již 85 % původní koncentrace analytů a po 3 hodinách v průměru 95% původní koncentrace analytů. Jakmile se navážka zdvojnásobí, dosáhne se po 30 minutách skoro 100 % účinnosti. U biocharu PRAu je účinnost pouze 30% po půl hodině míchání při navážce 0,5 g/l a při dvojnásobné navážce je účinnost kolem 50%.

*Tabulka S1: Přehled účinnosti odstraňování léčiv z ČOV pomocí biocharu 4073 při dvou různých navážkách*

| Analyt              | Pův. konc. (ng/l) | Navážka biocharu 4073 (0,5 g/1 l) |                            |                             | Navážka biocharu 4073 (1 g/1 l) |                            |                             |
|---------------------|-------------------|-----------------------------------|----------------------------|-----------------------------|---------------------------------|----------------------------|-----------------------------|
|                     |                   | t <sub>30</sub> odstr. (%)        | t <sub>60</sub> odstr. (%) | t <sub>180</sub> odstr. (%) | t <sub>30</sub> odstr. (%)      | t <sub>60</sub> odstr. (%) | t <sub>180</sub> odstr. (%) |
| 4-hydroxydiclofenac | 263               | 78,0                              | 89,1                       | 91,0                        | 97,6                            | 97,2                       | 98,3                        |
| Carbamazepin        | 332               | 90,5                              | 94,9                       | 95,3                        | 97,0                            | 96,9                       | 96,6                        |
| Clarithromycin      | 723               | 87,1                              | 92,9                       | 94,0                        | 95,8                            | 95,8                       | 95,6                        |
| Diclofenac          | 1576              | 88,3                              | 92,3                       | 94,2                        | 97,3                            | 97,5                       | 98,0                        |
| Ketoprofen          | 300               | 81,0                              | 89,5                       | 92,6                        | 95,3                            | 96,4                       | 97,3                        |
| Pentoxifyllin       | 85                | 90,1                              | 93,7                       | 94,7                        | 95,3                            | 95,2                       | 95,3                        |
| Phenazon            | 103               | 73,1                              | 84,0                       | 90,6                        | 100,0                           | 91,8                       | 100,0                       |
| Sulfamethoxazol     | 175               | 49,0                              | 44,1                       | 72,6                        | 81,4                            | 83,0                       | 87,6                        |
| Tramadol            | 352               | 91,3                              | 94,5                       | 95,6                        | 97,5                            | 96,9                       | 97,2                        |
| Trimethoprim        | 50                | 85,1                              | 88,2                       | 88,9                        | 90,1                            | 89,8                       | 89,8                        |
| Venlafaxin          | 233               | 84,5                              | 90,2                       | 93,5                        | 97,1                            | 96,0                       | 96,0                        |

Poznámka: výsledky jsou změřeny s 15% rozšířenou nejistotou, která byla vypočtena s použitím koeficientu rozšíření 2, což odpovídá konfidenční úrovni přibližně 95%.

Tabulka S2: Přehled účinnosti odstraňování léčiv z ČOV pomocí biocharu PRAu při dvou různých navážkách

| Analyt              | Pův. konc. (ng/l) | Navážka biocharu PRAu (0,5 g/l) |                            |                             | Navážka biocharu PRAu (1 g/l) |                            |                             |
|---------------------|-------------------|---------------------------------|----------------------------|-----------------------------|-------------------------------|----------------------------|-----------------------------|
|                     |                   | t <sub>30</sub> odstr. (%)      | t <sub>60</sub> odstr. (%) | t <sub>180</sub> odstr. (%) | t <sub>30</sub> odstr. (%)    | t <sub>60</sub> odstr. (%) | t <sub>180</sub> odstr. (%) |
| 4-hydroxydiclofenac | 263               | 37,3                            | 19,5                       | 36,8                        | 34,4                          | 30,7                       | 42,0                        |
| Carbamazepin        | 332               | 31,8                            | 51,4                       | 43,3                        | 50,4                          | 63,5                       | 74,9                        |
| Clarithromycin      | 723               | 47,8                            | 58,5                       | 64,8                        | 70,4                          | 75,6                       | 83,9                        |
| Diclofenac          | 1576              | 42,5                            | 34,2                       | 53,5                        | 49,6                          | 43,8                       | 55,7                        |
| Ketoprofen          | 300               | 3,1                             | 29,6                       | 32,5                        | 34,8                          | 31,1                       | 45,5                        |
| Pentoxifylin        | 85                | 40,6                            | 46,6                       | 54,7                        | 54,6                          | 74,6                       | 84,6                        |
| Phenazon            | 103               | 0                               | 26,0                       | 11,2                        | 46,0                          | 46,6                       | 46,3                        |
| Sulfamethoxazol     | 175               | 0                               | 36,9                       | 11,1                        | 0                             | 19,1                       | 39,1                        |
| Tramadol            | 352               | 26,9                            | 39,7                       | 49,1                        | 49,9                          | 58,4                       | 71,5                        |
| Trimethoprim        | 50                | 41,7                            | 51,4                       | 61,0                        | 71,9                          | 74,3                       | 80,9                        |
| Venlafaxin          | 233               | 2,7                             | 16,8                       | 28,0                        | 29,1                          | 47,9                       | 62,1                        |

Poznámka: výsledky jsou změřeny s 15% rozšířenou nejistotou, která byla vypočtena s použitím koeficientu rozšíření 2, což odpovídá konfidenční úrovni přibližně 95%.

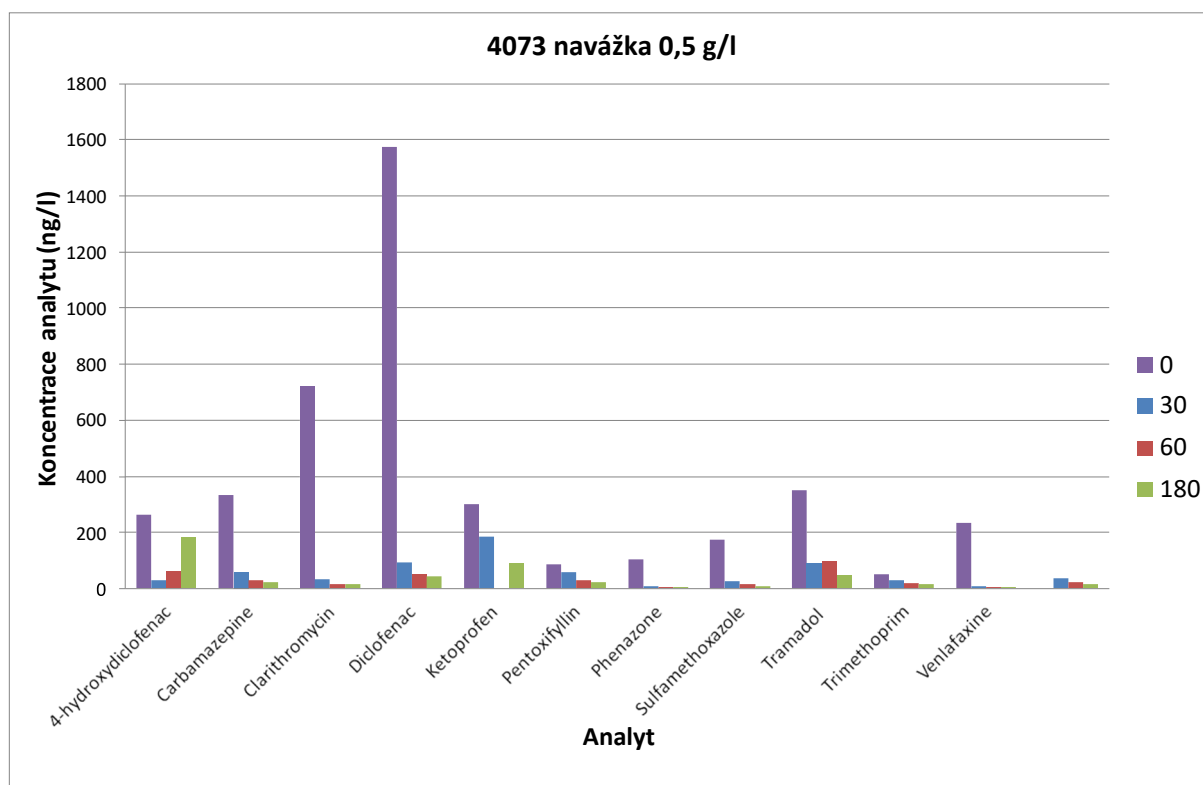

Obr. S1: Stanovení koncentrace analytu v ČOV vodě po míchání s biocharem 4073, kdy byla navážka biocharu 0,5 do 1 litru ČOV vody. Vzorky odebrány v čase 30, 60 a 180 minut.

## Sorpční testy

Na základě změřené ČOV vody byly testovány 4 analyty - Diclofenac, Tramadol, Clarithromycin, Sulfamethoxazol. Jelikož během testování sorpční kapacity docházelo k okamžité reakci Clarithromycinu s biocharem, byl vybrán ještě jiný analyt – Carbamazepin, který se také dosti vyskytuje v odpadních vodách. Při testování docházelo opět k rychlé sorpci, tak bylo možné proměřit pouze kinetiku sorpce (zobrazena na v grafu č. 2) a vliv účinnosti sorpce při různé navážce (graf č. 3). Z naměřených dat vyplynulo, že k sorpci analytu dochází již po 5 až 10 minutách, kdy je nasorbováno minimálně 50% analytu. U Clarithromycinu nedochází k postupné sorpci, ale k okamžité reakci na biocharu, což je dáno velikostí molekuly tohoto analytu a velkým množstvím funkčních skupin, které toto léčivo má.

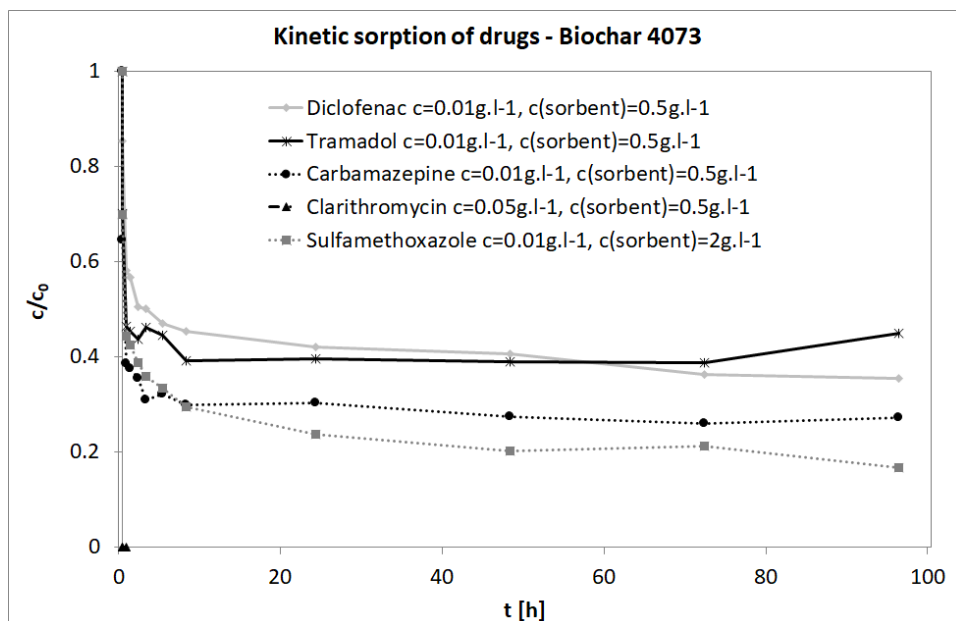

Obr. S2: Kinetika sorpce pro vybrané analyty

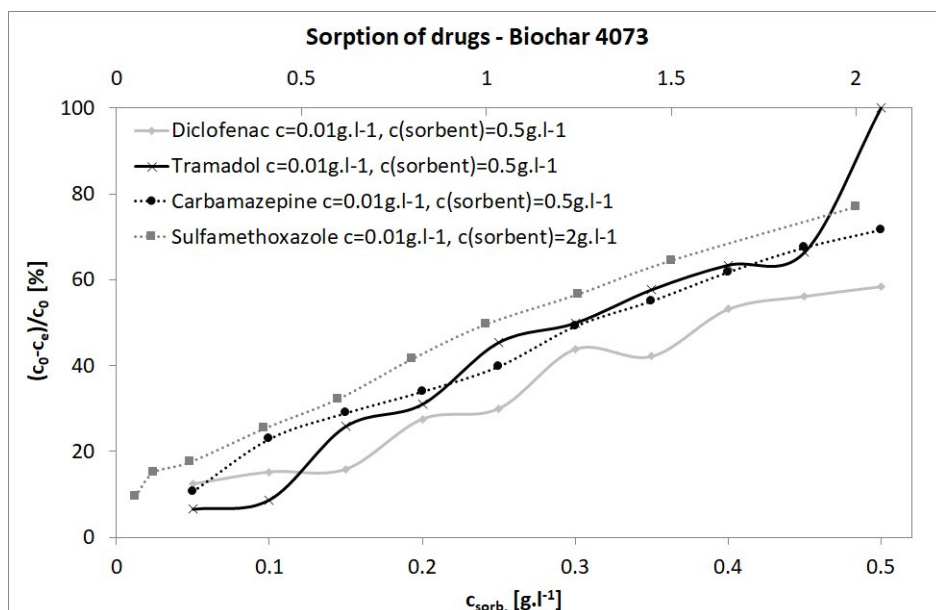

Obr. S3: Vliv navážky na sorbované množství analytu

Z grafu č. 3 vyplývá, že již při použití malého množství sorbentu (0,05 g/l) dochází k sorpci testovaných analytů. Aby bylo dosaženo maximálního odstranění testovaných analytů, stačí použít 0,5 až 1g/l biocharu. Výsledky platí pro testované koncentrace 4 léčiv.

### Stanovení funkčních skupin a prvková analýza

Pro stanovení funkčních skupin, které by mohly ovlivnit reakci analytů při sorpci, byl použit titrátor Titrino 795. Titrace byla provedena roztokem NaOH a HCl o koncentraci 0,1 mol/l. Z naměřených výsledků byl vypočítán obsah -COOH a -OH skupin. U vzorku 4073 byl stanoven obsah -OH skupin  $0,386 \pm 0,02$  mmol/g a pro PRAu byl stanoven obsah -OH skupin  $0,0807 \pm 0,004$  mmol/g. Tyto hodnoty potvrzují rozdílnou účinnost sorpce obou biocharů.

Dále byla provedena prvková analýza pro stanovení obsahu uhlíku, vodíku, dusíku a síry. Kyslík se dopočítává. Výsledky jsou vedeny v tabulce č. 3.

*Tabulka S3: Obsah prvků v testovaných biocharech*

| Biochar | uhlík (%) | vodík (%) | dusík (%) | síra (%) | kyslík (%) |
|---------|-----------|-----------|-----------|----------|------------|
| 4073    | 82,03     | 0,74      | 0,285     | 0        | 16,95      |
| PRAu    | 80,42     | 0,93      | 0         | 0        | 18,65      |

Poznámka: výsledky jsou změřeny s 5% rozšířenou nejistotou, která byla vypočtena s použitím koeficientu rozšíření 2, což odpovídá konfidenční úrovni přibližně 95%.

## Part C: Parameters of the soil used in the experiment

*Tabulka S1: Parametry půdy*

| Parameter                              | Value  |
|----------------------------------------|--------|
| Sand [%]                               | 84     |
| Silt [%]                               | 6      |
| Clay [%]                               | 10     |
| pH (H <sub>2</sub> O)                  | 7.1    |
| N <sub>tot</sub> [%]                   | 0.48   |
| Available P<br>[mg.kg <sup>-1</sup> ]  | 482.7  |
| Available Mg<br>[mg.kg <sup>-1</sup> ] | 734.6  |
| Available K<br>[mg.kg <sup>-1</sup> ]  | 1735.4 |
| Humus [%]                              | 13.54  |
